1 **Transposon-insertion sequencing in a clinical isolate of *Legionella pneumophila* identifies essential**  
2 **genes and determinants of natural transformation**

3 Léo Hardy<sup>1</sup>, Pierre-Alexandre Juan<sup>1</sup>, Bénédicte Coupat-Goutaland<sup>1</sup>, Xavier Charpentier<sup>1\*</sup>

4 <sup>1</sup> CIRI, Centre International de Recherche en Infectiologie, Team Horizontal gene transfer in bacterial pathogens,  
5 Inserm, U1111, Université Claude Bernard Lyon 1, CNRS, UMR5308, École Normale Supérieure de Lyon, Univ Lyon,  
6 69100, Villeurbanne, France

7 \* Corresponding author: [xavier.charpentier@univ-lyon1.fr](mailto:xavier.charpentier@univ-lyon1.fr)

8 **Abstract**

9 *Legionella pneumophila* is a Gram-negative bacterium ubiquitous in freshwater environments which, if  
10 inhaled, can cause a severe pneumonia in humans. The emergence of *L. pneumophila* is linked to several  
11 traits selected in the environment, the acquisition of some of which involved intra- and interkingdom  
12 horizontal gene transfer events. Transposon-insertion sequencing (TIS) is a powerful method to identify the  
13 genetic basis of selectable traits as well as to identify fitness determinants and essential genes, possible  
14 antibiotic targets. TIS has not yet been used to its full power in *L. pneumophila*, possibly because of difficulty  
15 to obtain a high-saturation transposon insertion library. Indeed, we found that ST1 isolates, to which belong  
16 the commonly used laboratory strains, are poorly permissive to saturating mutagenesis by conjugation-  
17 mediated transposon delivery. In contrast, we obtained high-saturation libraries in non-ST1 clinical isolates,  
18 offering the prospect of using TIS on unaltered *L. pneumophila* strains. Focusing on one of them, we  
19 therefore used TIS to identify essential genes in *L. pneumophila*. We also revealed that TIS could be used to  
20 identify genes controlling vertical transmission of mobile genetic elements. We then applied TIS to identify all  
21 the genes required for *L. pneumophila* to develop competence and undergo natural transformation, defining  
22 the set of major and minor Type IV pilins that are engaged in DNA uptake. This work paves the way for the  
23 functional exploration of the *L. pneumophila* genome by TIS and the identification of the genetic basis of  
24 other life traits of this species.

25 **Importance**

26 *Legionella pneumophila* is the etiologic agent of a severe form of nosocomial and community-acquired  
27 pneumonia in humans. *L. pneumophila* is found in man-made and freshwater environments which are the  
28 causing source of the infection. The environmental life traits of *L. pneumophila*, such as its abilities to form  
29 biofilms, resist biocides and unicellular predators, are essential to its ability to accidentally infect humans. A  
30 comprehensive identification of the genetic basis of these life traits could be obtained through the use of  
31 transposon-insertion sequencing. Yet, this powerful approach, had not been fully implemented in *L.*  
32 *pneumophila*. Here we described the successful implementation of the transposon-sequencing approach in a  
33 clinical isolate of *L. pneumophila*. We identify essential genes, potential drug targets, and genes required for  
34 horizontal gene transfer by natural transformation. This work represents an important step towards  
35 identifying the genetic basis of the many life traits of this environmental and pathogenic species.

## 36 Introduction

37 *Legionella pneumophila* is a Gram-negative bacterium, ubiquitous in freshwater environments where it can  
38 be found in planktonic form, in biofilm communities or associated to amoebic protozoa which constitute its  
39 natural host (1). *L. pneumophila* can resist predation by amoeba and even establish an intracellular vacuole  
40 in which it can multiply, while being protected from external environment (2). Man-made water systems have  
41 offered a new breeding-ground for the development of *L. pneumophila*. Inhalation by humans of aerosols  
42 produced by these systems and contaminated by *L. pneumophila* can cause Legionnaires' disease (3). This  
43 community-acquired disease, which is most often characterized by a severe pneumonia, occurs when *L.*  
44 *pneumophila* infects alveolar macrophages (4). In both macrophages and its natural amoebal hosts, *L.*  
45 *pneumophila* replicates intracellularly by hijacking the host cellular machinery (5). This requires the Icm/Dot  
46 type IV system (6, 7), a conjugative system that can secrete up to 300 effector proteins (8, 9). The first  
47 genome sequences of the original Philadelphia outbreak strain Philadelphia-1 (10) and the endemic strain  
48 Paris (11) provided early evidence of genes encoding eukaryotic-like proteins, some of which are the effector  
49 proteins substrates of the Icm/Dot system. Phylogenetic analyses suggest that these genes would have been  
50 acquired by inter-kingdom horizontal gene transfer (HGT) during co-evolution of *Legionella* and its natural  
51 host for millions of years (12). Hundreds of genome sequences of *L. pneumophila* clinical isolates have now  
52 revealed that recombination events are common in this species (13–15). Thus, intra-specific and inter-  
53 kingdom HGT events are playing a major role in the evolution and adaptation of this species. The high  
54 plasticity of the genomes of *L. pneumophila* is consistent with the fact that it is competent for natural  
55 transformation (16). Natural transformation refers to the ability of certain bacteria to capture exogenous DNA  
56 and integrate it into their genome by homologous recombination (17). It is one of the driving forces for  
57 bacterial evolution that can lead to the emergence of new pathogenic bacteria and new antibiotic-resistant  
58 recombinants. It is a widespread mechanism of HGT in bacteria, with more than 80 experimentally-confirmed  
59 transformable species (18). The DNA uptake mechanisms and associated proteins constituting the so-called  
60 “DNA uptake machinery” are highly conserved (17), suggesting that most species are potentially  
61 transformable. DNA uptake first involves a type IV pilus (T4P) (19) whose direct observation supports a  
62 model in which it binds DNA via its tip, and its retraction allows the internalization of DNA into the periplasm  
63 (20). The periplasmic DNA-binding protein ComEA serves as a ratchet (21, 22) and large amounts of DNA  
64 can accumulate in the periplasm before being converted into single-stranded DNA (ssDNA) and translocated  
65 across the cytoplasmic membrane through the ComEC inner membrane channel (23). In the cytoplasm, the  
66 ssDNA is protected by the transformation-dedicated protein DprA (24) and the single-stranded binding  
67 protein SsbB (25). If the internalized ssDNA possesses homologous regions with the bacterial chromosome,  
68 it is integrated by homologous recombination mediated by the recombinase RecA which interacts with DprA  
69 (26). In Gram-negative bacteria, the newly discovered ComM helicase is also involved in this recombination  
70 process (27).

71 In most transformable species, these proteins are not expressed constitutively but only when the bacterium  
72 is in a genetically programmed and transient state called “competence” (28). *L. pneumophila* was first  
73 reported competent when grown at 37°C under some form of stress, such under microaerophilic conditions  
74 (16) or exposure to DNA-damaging agents (29). In the absence of any stress, *L. pneumophila* becomes  
75 transiently competent when grown at 30°C at the transition between the exponential and stationary growth

76 phases (30, 31). *L. pneumophila* is unique in that the regulation of competence does not involve  
77 transcriptional activation of the competence regulon. Rather, the core genes encoding the DNA uptake  
78 system (*comEC*, *comEA*, *comFC*, *comM*) are subjected to post-transcriptional repression by a  
79 ribonucleoprotein complex consisting of a small RNA, RocR, and an RNA chaperone, RocC (31). At the  
80 onset of the stationary phase, the expression of RocR decreases and the translation of the mRNAs encoding  
81 the DNA uptake system allows *L. pneumophila* to take up and recombine extracellular DNA. Most of *L.*  
82 *pneumophila* clinical isolates do transform under these conditions, yet some isolates fail to develop  
83 competence and in some instance, this is due to the presence of a mobile genetic element (MGE) that  
84 encodes a RocR homolog that acts as a substitute of the chromosome-encoded RocR (32). Competence is  
85 further repressed in stationary phase by the quorum-sensing system (33). The regulation of competence in  
86 *L. pneumophila* still remains poorly understood (34).

87 Regulation of competence is best understood in the Gram-positive *Streptococcus pneumoniae* in which the  
88 comprehensive genetic approach of transposon-insertion sequencing has recapitulated decades of findings  
89 (35). Beyond the identification of additional regulatory or functional elements of natural transformation, such  
90 approach allowed for a better understanding of the biology of this bacterium by identifying genes involved in  
91 virulence and in resistance against stresses. Transposon-insertion sequencing (TIS) approaches encompass  
92 a number of similar methods (Tn-seq, TraDIS, INseq, HITS) (36–39) that have been used for the  
93 identification of essential genes on a genome-wide scale in a number of species (40). TIS relies on the  
94 mapping and quantification of transposon insertion mutants by high-throughput DNA sequencing and a  
95 critical factor is to obtain high-saturation libraries of transposition mutants (41). TIS has recently been applied  
96 to *L. pneumophila* with a focus on effector-encoding genes and their conditional involvement in intracellular  
97 replication (42, 43). However, the libraries of mutants were either targeted for effectors (42) or of low  
98 coverage (43). Thus, the full power of TIS has not yet been harnessed to understand fundamental or specific  
99 aspects of the biology of *L. pneumophila*, possibly because of the difficulty of obtaining high-saturation  
100 mutant libraries. In addition, the current libraries were constructed in the Ip02 strain which has lost  
101 competence regulation during its laboratory domestication (44). Here we sought to obtain a high coverage  
102 library for Tn-seq in *L. pneumophila* that could be used to apprehend the genetic basis the many life traits of  
103 this species. We found that some clinical isolates of *L. pneumophila* are more permissive to transposon  
104 mutagenesis than the commonly used laboratory strains. We obtained a high coverage Tn-seq library in an  
105 unaltered clinical isolate, and identified genes essential for fitness and growth in axenic medium. We then  
106 applied Tn-seq to identify the genes involved in competence and natural transformation.

## 107 **Results and discussion**

### 108 *A high-saturation Tn-seq library of L. pneumophila*

109 With the objective of obtaining a Tn-seq library of *L. pneumophila*, we tested the conjugative delivery of the  
110 Himar1-based transposon encoded by the *pir*-dependent mobilizable plasmid pBT20 to the commonly used  
111 strain Paris. Conjugation assays with the MFD<sub>pir</sub> donor strain only produced a handful of insertional mutants.  
112 We hypothesized that the Paris strain was particularly resistant and tested 12 other clinical isolates  
113 belonging to the sequence type (ST) 1. Similarly to the Paris strain, none of the ST1 isolates generated a  
114 meaningful number of mutants. We concluded that for an unknown reason the ST1 isolates (which would

115 include the Philadelphia-1 derived laboratory strains Ip02 and JR32) were poorly permissive to conjugative  
116 transfer and/or to transposition by Himar1. We thus tested 8 other non-ST1 clinical isolates. We obtained  
117 several thousands mutants for 5 of these. We decided to pursue with isolate HL-0709-3014, for which we  
118 obtained a complete genome composed of a circular chromosome of 3,405 kb and a plasmid of 106 kb (see  
119 Material and Methods). 3,183 open-reading frames were detected, 2,791 and 2,741 of which have orthologs  
120 in the Paris and Philadelphia-1 strains, respectively (Dataset S1). HL-0709-3014 belongs to the ST18  
121 lineage, which is closely related to the ST1 lineage. Hence, it is phenotypically similar to the Paris strain, it is  
122 naturally transformable and shows similar intracellular replication rates in amoebae (Fig. S1). It also  
123 effectively replicates in human and murine macrophages (>2 log growth in 72 h) (Fig. S1). We isolated  
124 HL77S, a spontaneous streptomycin-resistant mutant of HL-0709-3014, and subjected it to mutagenesis with  
125 the transposon of pBT20. This mariner-based transposon inserts at TA sites and includes an outward facing  
126 Ptac promoter that can minimize possible polar effects on operon and downstream genes. About 250,000  
127 colonies of mutants were isolated on CYE plates and collected (initial isolation). The library was then cultured  
128 in rich medium at 30°C and re-isolated on CYE (second isolation). Sequencing of the transposon insertion  
129 sites revealed a maximum of 110,679 unique insertion out of 255,021 possible TA sites (43% saturation) and  
130 an average of one insertion site every 31 bp. This represents a significant improvement over the previously  
131 published library in the ST1 Ip02 strain which consisted in 17,781 unique insertions sites (7% saturation)  
132 (43). Thus, we obtained a high saturation Tn-seq library in an *L. pneumophila* clinical isolate that can be  
133 used as a surrogate to the commonly used laboratory strains (Paris, JR32, Ip02, AA100).

#### 134 *Analysis of gene essentiality*

135 The high saturation allowed the identification of genes essential for growth. To do so, we used two statistical  
136 methods; the Gumbel method (45), a Bayesian model based on longest consecutive sequence of TA sites  
137 without insertion in the genes, and the HMM method based on the detection of genes with unusually low  
138 read counts (46). Both methods gave similar results with 401 (Gumbel) and 500 genes (HMM) identified as  
139 essential, 382 of which were identified as essential by both methods (Dataset S1). This is consistent with the  
140 average number (391) of essential genes identified in other bacterial species (47). The data confirmed our  
141 previous observation of the essentiality of the actin-like protein MreB (48) but also of MreC and MreD, while  
142 intergenic insertions between *mreC* and *mreD* are tolerated (Fig. 1A). Comparative analysis of the second  
143 and initial isolation, identified 181 genes non-essential at the initial isolation but whose inactivation impaired  
144 fitness ( $\log_2FC < -2$ ,  $P < 0.05$ ). These include the gene encoding the exoribonuclease R, whose growth defect  
145 was previously reported (49), the RNA chaperone Hfq, but also more surprisingly the substrates of the  
146 Icm/Dot Type IV secretion AnkQ and SdB (Dataset S1). Presumably because their inactivation lowered the  
147 fitness so dramatically, 61 genes not essential after the initial isolation were deemed essential on the second  
148 isolation. For instance, these include the phosphoenolpyruvate synthase-encoding gene *ppsa* (Fig. 1A), the  
149 genes encoding the sigma factor RpoS, the RecA recombinase, the tyrosine recombinase XerC involved in  
150 chromosome dimers resolution and the tmRNA-binding protein SmpB involved in trans-translation. Indeed,  
151 this is consistent with our previous demonstration that trans-translation is essential in *L. pneumophila* (50)  
152 and that no insertions are observed in the tmRNA-encoding gene (Fig. 1B). The vast majority of the essential  
153 genes have orthologs in the Paris and Philadelphia-1 genome, as expected for genes that encodes proteins  
154 involved in the fundamental processes of the cell. However, of all genes found to be essential either on initial

155 or second isolation, 14 have no orthologs in the Paris and Philadelphia-1 strains. How could strain-specific  
156 genes be essential? Three of these genes (HL77S\_01135, HL77S\_01141, HL77S\_01146) encode antitoxin  
157 component of toxin-antitoxin (TA) modules clustered within a 4 kb segment. HL77S\_01068 is located next to  
158 a gene encoding a toxin of type II TA system, suggesting that it also encodes an antitoxin. Others have no  
159 known function, such as HL77S\_02141 which encodes a protein with a predicted helix-turn-helix (HTH) motif  
160 or HL77S\_00079 encoding a protein with a conserved domain of unknown function (DUF3800). Consistently  
161 with being part of the accessory genome, genomic comparison with other complete genome of *L.*  
162 *pneumophila* indicate that all of these genes reside in highly variable regions, often in proximity to putative  
163 transposase and prophage integrase. Yet, no genetic structure corresponding to a complete mobile genetic  
164 element (MGE) could be detected. In contrast, two essential genes (HL77S\_00162, HL77S\_00189) are  
165 within a recognizable MGE corresponding to an integrative conjugative element (ICE) inserted at the 3' end  
166 of the tmRNA-encoding gene and carrying a conjugative system homologous to the Lvh system (Fig. 1B).  
167 HL77S\_00162 is an HTH-type regulator and HL77S\_00189 is predicted to encode a DNA-cytosine  
168 methyltransferase. The ICE shows a third essential gene (HL77S\_00187, *prpA*), conserved in the lvh ICE of  
169 the Paris strain and encoding a LexA/Ci-like repressor homolog (Fig. 1B). Another strain-specific essential  
170 gene (HL77S\_00197) is located just downstream of the ICE, in a unique region that may represent a  
171 remnant of another MGE. Another three of the 14 strain-specific essential genes (HL77S\_03181,  
172 HL77S\_03182, HL77S\_03183) are part of the 106-kb conjugative plasmid and clustered with another  
173 essential gene (HL77S\_03071) which has a homolog on the pLPP plasmid of the Paris strain (Fig. 1C).  
174 Encoding Rep or Par homologs, these genes are involved in replication/partition of the plasmid and their  
175 inactivation likely resulted in plasmid loss. On this plasmid, two other genes of unknown function also appear  
176 essential, one that is unique and with no conserved domain (HL77S\_03140) and one with a homolog on  
177 pLPP (HL77S\_03116, *plpp0094*) containing an N-terminal HTH motif and a C-terminal nucleotidyltransferase  
178 (NT) domain also found in DNA polymerase beta (Fig. 1C). Insertions in two divergently oriented genes  
179 (HL77S\_03176, HL77S\_03177) are also associated with strong fitness defects and are of unknown function  
180 (Fig. 1C). Overall, we found that many essential genes can be found within MGEs. Insertion in genes  
181 controlling vertical transmission can result in the loss of the MGE (and thus of transposon-insertions making  
182 the corresponding gene seemingly essential). This might be the case for repressor of excision of ICE or  
183 genes required for replication/partition of plasmids. Other genes might be required to limit the cost of the  
184 MGE on the fitness of their host. This might be the case for the LexA/Ci-like repressor of ICE, as exemplified  
185 by the *Vibrio cholerae* SXT ICE, for which inactivation of the LexA/Ci-like repressor SetR is deleterious to its  
186 host (51). Whatever the mechanism, the genes characterized as essential in MGEs ensure their vertical  
187 transmission. Thus, our result indicates that in addition to identifying genes required for the fundamental  
188 functions of the cell, Tn-seq analyses can also reveal novel genes that contribute to vertical transmission of  
189 MGEs, representing an untapped resource to study the bacteria-MGE co-evolution.

#### 190 *Tn-seq analysis of natural transformation in L. pneumophila*

191 We seek to use the Tn-seq library to identify all genes required for competence and subsequent natural  
192 transformation. Mutants defective for expression of competence, DNA uptake, protection or recombination  
193 would not be able to undergo transformation and would thus be missing in the transformed population. We  
194 subjected the Tn-seq library to natural transformation with two distinct transforming DNA carrying a

195 kanamycin resistance cassette inserted in the *legk2* gene (encoding an Icm/Dot substrate) or in the *ihfB*  
196 gene (encoding the B subunit of the integration host factor IHF). This strategy should limit false positive  
197 arising from epistatic interactions between the gene in which the selected resistance cassette is inserted  
198 (*legk2* or *ihfB*) and the transposon-disrupted genes. Transformation frequencies of the HL77S Tn-seq library  
199 were in the range of  $1 \times 10^{-5}$ - $6 \times 10^{-4}$  and to avoid a bottleneck effect (41) we collected over  $5 \times 10^6$   
200 transformants. The control, non-transformed populations were sub-sampled to obtain a similar number of  
201 isolated colonies. We observed 28 genes in which insertions cause a decrease ( $\log_2FC < 2$ ,  $P < 0.05$ ) of the  
202 mutants in the population transformed with either the *legK2::kan* or the *ihfB::kan* DNA (Fig. 2A). As expected,  
203 these include the gene encoding the periplasmic DNA receptor ComEA, the genes required for DNA  
204 transport across the inner membrane (*comEC*, *comFC*), for ssDNA protection in the cytoplasm (*dprA*) and  
205 recombination (*comM*). Many of the other genes encode factors known to be involved in Type IV pilus  
206 assembly, confirming the role of this system in natural transformation of *L. pneumophila* (16). These include  
207 the retraction ATPase PilT (*lpp1995*), the extension ATPase PilB, the PilQ secretin, the PilC platform protein  
208 and the proteins of the PilMNOP complex. Interestingly, we observed no transformation defect for insertions  
209 in the gene encoding another putative pilus retraction ATPase (*lpp2271*). Two putative pilins, pilE (*lpp0681*)  
210 and pilA\_2 (*lpp1890*) were also identified as essential for transformation. Other genes potentially involved in  
211 natural transformation or regulation of competence were also identified (*lpp1976*, *lpp1977*, *lpp1978*, *lpp3030*,  
212 *lpp2632*, *djlA*, *letA*, *letS*). In order to confirm their role and disentangle their involvement in DNA uptake or in  
213 regulation, we constructed gene deletion mutants in a Paris strain with a premature stop codon of the RocC  
214 chaperone (Paris *rocC<sub>TAA</sub>*) which is defective for repression of competence and constitutively transformable  
215 (31). Deletion mutants corresponding to genes known to be involved in natural transformation were defective  
216 for transformation as expected (Fig. 2B). The *comEC* and *comFC* mutants were totally defective for  
217 transformation, the *comM* and *comEA* mutants showed a ~100-fold decrease in transformation frequencies  
218 as observed for other species (27, 52). Similar partial transformation defects were observed for mutants of  
219 *djlA*, encoding a DnaJ-like protein required for intracellular replication in *Legionella dumoffii* (53), and  
220 *lpp3030*, a *Legionellaceae*-specific gene encoding an uncharacterized protein with a putative signal peptide.  
221 However, in this constitutively competent background we could not confirm the involvement of *lpp2632* which  
222 encodes a glutaryl-CoA dehydrogenase, indicating that this gene is dispensable for the transformation  
223 process (Fig. 2B). Mutants of this gene show a reduced fitness ( $\log_2FC = -1.99$ ,  $P < 0.01$ ) (Dataset S1),  
224 suggesting that the transformation defect observed in the Tn-seq analysis is an indirect consequence of the  
225 mutants limited growth that could prevent entry in the competence state at the onset of the stationary phase.  
226 Intriguingly, in this constitutively competent strain, a deletion mutant of *letS* also showed no transformation  
227 defect (Fig. 2B). LetS is the sensor of the LetA/LetS two-component system (TCS) homologous to the BarA/  
228 UvrY system in *Escherichia coli* (54) and GacS/GacA in *Pseudomonas* spp (55). In *L. pneumophila*, the LetA/  
229 LetS system has been identified for the first time in a screen of mutants deficient in the expression of flagellin  
230 (56) and has since been shown to be involved in the activation of various virulence traits as well as  
231 intracellular growth in amoeba (57–60). One of the major roles of the LetA/S TCS is to enable the transition  
232 from the transmissive to the replicative phase (61). The facts that both LetA and LetS output together in the  
233 transformation screens while the *rocC<sub>TAA</sub> ΔletS* mutant is not defective for transformation suggests that this  
234 TCS is involved in the regulation of competence in *L. pneumophila*. To test this, we reconstructed an  
235 insertion mutant of the *letA* gene encoding the activator of this TCS in the Paris strain and *rocC<sub>TAA</sub>* genetic  
236 backgrounds and tested them for their ability to undergo transformation. Consistent with the Tn-seq data,

237 inactivation of LetA in the Paris strain reduced transformability by over 500-fold (Fig. 2C). In contrast, like the  
238  $\Delta letS$  mutant, the  $\Delta letA$  mutant in the constitutively competent strain  $rocC_{TAA}$  is only marginally affected for  
239 natural transformation (Fig. 2C). These data suggest that the LetA/S TCS is involved in the regulation of  
240 competence upstream of the regulation controlled by the RocC/RocR system. Further work will be needed to  
241 determine the precise role of this TCS and the associated regulatory cascades in the regulation of *L.*  
242 *pneumophila* competence.

#### 243 *Major and minor pilins required for natural transformation*

244 With the remarkable exception of *Helicobacter pylori* (62), in all Gram-negative bacteria DNA uptake requires  
245 type IV pili (19). Type IV pili are extracellular filaments resulting from the assembly of thousands copies of an  
246 abundant major pilin but also of less abundant minor pilins that could be embedded in the filaments (core  
247 minor pilins) or at its tip (non-core minor pilins) (63, 64). The nomenclature of pilins is relatively confusing but  
248 the major pilin is generally called PilA, although in *Neisseria sp.* that protein is called PilE (64). In addition,  
249 some species carry multiple copy of pilins and at least in *Thermus thermophilus* two major pilins (PilA4 and  
250 PilA5) are assembled into distinct filaments respectively required for natural transformation and twitching  
251 motility (65). The *L. pneumophila* genomes show two putative PilA homologs encoded by two consecutive  
252 genes (*pilA\_1*, lpp1889; *pilA\_2*, lpp1890) in a locus away from any other genes encoding Type IV pilus  
253 components. Both the Tn-seq data and reconstructed mutants show that *PilA\_2* is required for natural  
254 transformation while *PilA\_1* is dispensable (Fig. 2A and 2B). The two copies of *PilA*-encoding genes may  
255 have resulted from a gene duplication event, followed by the loss of function of one of the two copies. The  
256 Tn-seq data show that a putative pilin *PilE* (Lpp0681) appears required for transformation, while five genes  
257 upstream of *pilE* (*lpp0686-lpp0682*) and respectively annotated as *PilC/PilY1* and minor pilins *PilX*, *PilW*, *PilV*  
258 and *GspH/FimT* appears dispensable. Targeted gene deletion also confirmed the Tn-seq result that *PilE* is  
259 required for natural transformation, corroborating an initial observation that a mutant of the *pilE* gene (then  
260 denoted *pilE<sub>L</sub>*) is not competent for transformation (16). Based on sequence comparison with *PilA* from *P.*  
261 *aeruginosa*, *pilE<sub>L</sub>* was then proposed to encode a type IV pilin structural gene (66). We thus investigated  
262 which of *PilE* and *PilA\_2* constitute the major pilin in *L. pneumophila*. We tested the complementation of the  
263  $\Delta pilE$  and  $\Delta pilA_2$  deletion mutants obtained in the constitutively competent strain  $rocC_{TAA}$ . Both *pilE*  
264 (*lpp0681*) and *pilA\_2* (*lpp1890*) were ectopically expressed from an IPTG-inducible promoter to produce  
265 fusion proteins with a C-terminal FLAG epitope. Western-blot analysis showed that both *PilE*-FLAG and  
266 *PilA\_2*-FLAG could be expressed in an IPTG-dependent manner with *PilE*-FLAG always expressed at a  
267 higher level than *PilA\_2*-FLAG, likely reflecting the efficiency of their ribosome-binding site (Fig. 3A). Data  
268 show that a low expression of *PilE*-FLAG is sufficient to restore natural transformation in the  $rocC_{TAA} \Delta pilE$   
269 mutant as full complementation of the transformation phenotype is obtained even in the absence of IPTG  
270 (Fig. 3B). In contrast, a higher concentration of IPTG and thus a higher expression of *PilA\_2*-FLAG is  
271 required to obtain a functional complementation of the  $rocC_{TAA} \Delta pilA_2$  mutant (Fig. 3B). The results are  
272 consistent with a model in which *PilA\_2* is the major pilin while *PilE* is a low-abundance minor pilin. In  
273 addition, when expressed ectopically in the  $rocC_{TAA}$  strain, *PilA\_2*-FLAG assembles in long extracellular  
274 filaments (Fig. 4A and 4B). In the  $rocC_{TAA} \Delta pilE$  strain, fewer *PilA\_2*-FLAG filaments are observed by  
275 microscopy and western-blot confirmed a lower abundance of extracellular *PilA\_2*-FLAG (Fig. 4A and 4B).  
276 This indicates that *PilE*, while not strictly essential still plays a role in pilus formation. Minor pilins have been

277 proposed to localized at the tip of the pilus and stabilize it (63). In *Vibrio cholerae*, DNA binding has been  
278 observed to occur at the tip of the pilus (20). Because PilE is not strictly essential for pilus assembly but  
279 required for transformation and DNA internalisation (Fig. 3B and 4C), we propose that PilE is the DNA  
280 receptor at the tip of a pilus composed of PilA<sub>2</sub> subunits.

### 281 *Genes of unknown function and pilZ*

282 In addition to the pilin mutants that were strongly defective for natural transformation, we investigated the  
283 underlying reason for the strong transformation defect of the mutant deleted of the operon *lpp1976-lpp1977-*  
284 *lpp1978* (Fig. 2B). Consistent with being important for natural transformation this operon was found to be up-  
285 regulated in the constitutively transformable mutant *rocC<sub>TAA</sub>* (31). Automated annotation did not assign a  
286 predicted function for the three genes and blast search failed to identify homologs outside of the *Legionella*  
287 genus. The deletion mutant of the entire operon  $\Delta$ *lpp1976-8* was found unable to take up DNA (Fig. 4C),  
288 indicative of a defect in Type IV pilus-mediated DNA import. Indeed, in this mutant, the levels of extracellular  
289 PilA<sub>2</sub>-FLAG were strongly reduced (Fig. 4B). The mutant produced few, and short, PilA<sub>2</sub>-FLAG filaments  
290 (Fig. 4A) revealing a major defect in Type IV pilus assembly or stability. A search for conserved domains in  
291 the three predicted proteins only identified, in the 268 aa-long Lpp1977, a partial homology with the N-  
292 terminal part of the Tfp pilus assembly protein PilW. This suggested that *lpp1976-lpp1977-lpp1978* would  
293 encode a set of minor pilins. Indeed, PilFind (67) identified an N-terminal transmembrane segment in all  
294 three predicted proteins and a type III signal in Lpp1977 and Lpp1978. The operonic organization of these  
295 three genes is reminiscent of the operon encoding four minor pilins of the type IV pilus of *N. meningitidis*  
296 (*pilHIJK*) and *P. aeruginosa* (*fimU-pilVWX*) and of the Type II secretion system (T2SS) of enterotoxigenic *E.*  
297 *coli* (*gspHIJK*). In the latter system, the last three genes (*gspIJK*) encode minor pseudopilins which  
298 assemble into a stable complex (68). This complex of minor pilins would form in the inner membrane to  
299 establish a platform for the assembly of the major pilin (69), and remain at the tip of the pilus, stabilizing it  
300 (63). Such heterotrimeric complex may be formed by minor pilins of limited homology but displaying  
301 structural similarity (70). Altogether, this supports the hypothesis that in *Legionella* species, the initiation  
302 complex of the transformation pilus is formed by Lpp1976, Lpp1977 and Lpp1978 which serve as a scaffold  
303 for assembly of the major pilin PilA<sub>2</sub>.

304 Another gene whose deletion resulted in strong deficiency in natural transformation is *pilZ*. The  $\Delta$ *pilZ* mutant  
305 is defective for DNA uptake and is totally unable to produce extracellular PilA<sub>2</sub> or assemble PilA<sub>2</sub> filaments  
306 (Fig. 4). PilZ was originally identified in *P. aeruginosa* as required for the secretion of PilA polymers, pilus  
307 genesis and Type IV pilus-dependent motility (71). Although the *P. aeruginosa* PilZ served as the founding  
308 member of a diverse family of proteins with PilZ domains (72), some of which bind the cyclic-di-GMP second  
309 messenger, it itself does not bind c-di-GMP (73). A *pilZ* mutant in *Xanthomonas campestris* pv. *campestris*  
310 displays a minor defect in Type IV pilus-dependent motility (74) and this PilZ ortholog directly binds to the  
311 PilB ATPase and the c-di-GMP interacting FimX protein (75). Yet, no homolog for FimX could be identified in  
312 *L. pneumophila* and Tn-seq did not reveal any c-di-GMP synthesis enzyme required for natural  
313 transformation. However, Tn-seq did show that PilB was important for transformation (Fig. 2A). We thus  
314 speculate that, in *L. pneumophila*, PilZ controls Type IV pilus assembly independently of c-di-GMP signaling  
315 and through a direct interaction with PilB.



## 316 **Conclusion**

317 We report on a clinical isolate of *L. pneumophila*, which displays phenotypes (intracellular replication,  
318 competence for natural transformation) similar to commonly used laboratory strains. In contrast to laboratory  
319 strains, a high-saturation Tn-seq library could be obtained and allowed to define essential genes, including  
320 strain-specific genes in MGEs. Tn-seq analyses of transformation, with follow-up work performed in the Paris  
321 strain, defined the set of major and minor Type IV pilins that are engaged in DNA uptake. While we here  
322 focused on mutants that were strongly deficient for natural transformation, Tn-seq also identified potential  
323 regulators of competence as well as genes of unknown function that also participate in natural transformation  
324 (for instance *djlA* and *lpp3030*). We exemplify here that strain HL77S could represent a surrogate for the  
325 commonly used lab strains to perform Tn-seq analysis. Unleashing the full power of Tn-seq is a major step  
326 toward the identification of the genetic basis of traits that turned *L. pneumophila* into a successful pathogen,  
327 such as its ability to form biofilms, resist biocides and unicellular predators.

## 328 **Material and methods**

### 329 *Bacterial strains and growth conditions*

330 *Legionella pneumophila* strains were grown in liquid medium ACES [N-(2-acetamido)-2-aminoethanesulfonic  
331 acid]-buffered yeast extract (AYE) or on solid medium ACES-buffered charcoal yeast extract (CYE) plates.  
332 When appropriate kanamycin, gentamycin and streptomycin were added respectively at 15 µg/mL, 10 µg/mL  
333 and 50 µg/mL. Clinical isolates of *L. pneumophila*, including HL-0709-3014 (“HL77”), were provided by the  
334 Centre National de Référence des Légionelles, Lyon, France. A streptomycin-resistant of HL-0709-3014  
335 mutant was obtained by plating 1 mL of culture on streptomycin-containing CYE plate and named HL77S.  
336 The *Escherichia coli* MFDpir (76) with chromosome-integrated RP4 conjugative system was used as donor  
337 strain for conjugative transfer of the mutagenesis system pBT20 (77) that carries a Himar1 transposon  
338 bearing a gentamycin resistance gene and an outward-facing promoter. MFDpir is auxotrophic for  
339 diaminopimelic acid (DAP) and thus was always cultivated with 1% DAP. Axenic *Acanthamoeba castellanii*  
340 cells were grown in PYG medium (Proteose yeast extract glucose medium) at 30°C and split once or twice a  
341 week. Human U937 cells were maintained in RPMI 1640 with 10 % heat-inactivated fetal calf serum and 1 %  
342 penicillin/streptomycin at 37°C and 5 % CO<sub>2</sub>. Differentiation into macrophages was induced by the addition  
343 of PMA (phorbol 12-myristate 13-acetate) at a final concentration of 100 ng/ml. Murine macrophages RAW  
344 264.7 were cultured in DMEM medium supplemented with 10% FBS and 1% penicillin/streptomycin at 37°C  
345 and 5 % CO<sub>2</sub>.

### 346 *Intracellular growth experiments*

347 The ability of HL77S strain to infect host cells was compared to the Paris strain. Paris  $\Delta dotA$  was used as a  
348 negative control as this mutant is unable to multiply in host cells. The ability of HL77S to replicate in the  
349 amoeba *Acanthamoeba castellanii* was determined as follows. Amoebas were resuspended in PYG medium

350 at a concentration of  $1.10^6$  amoebas/mL. The suspension was distributed in a flat-bottom 6-well plate (2 mL  
351 per well,  $2.10^6$  amoebas per well) and incubated 3 h at 30°C to allow amoebas to settle and adhere to the  
352 plate. 1 mL of a PY medium suspension containing  $2.10^6$  bacteria (from a culture in stationary phase OD~5)  
353 were added in each well to obtain the multiplicity of infection (MOI) of 1. The plate was centrifuged 10 min at  
354 650 g and incubated at 30°C for 72 h. At T=0, 48 h and 72 h, 250  $\mu$ L of supernatant of each well were serial-  
355 diluted and spotted onto CYE plates and incubated at 37°C for 72 h to determine the number of colony-  
356 forming units (CFU) per mL. The ability of *L. pneumophila* strains to infect macrophages was determined as  
357 follows. Overnight cultures of bacterial strains (OD~5 in AYE medium) were diluted (1:10) in the appropriate  
358 cell culture media (DMEM for RAW 264.7 and RPMI 1640 for U937) and incubated for 1 h at 37°C. Host cells  
359 (differentiated U937 and RAW 264.7) were seeded in 24-well plates, 3 wells per condition. Cells were  
360 washed and were infected with bacteria at a MOI of 1 or 10. Plates were centrifuged at 500 g for 5 min to  
361 promote bacteria-cell contact and incubated at 37°C and 5% CO<sub>2</sub> for 24 h to 72 h. Every 24 h, the content of  
362 one well per condition was transferred to an 1.5 mL tube and centrifuged at 16,000 g for 5 min. The pellet  
363 containing the infected macrophages was resuspended in sterile distilled water to lyse the macrophages and  
364 release the bacteria. The suspension was serial-diluted and spotted onto CYE plates and incubated at 37°C  
365 for 72 h to determine the titer in CFU/mL.

#### 366 *Plasmid and strains constructions*

367 Plasmid pJET1.2-*legk2::kan*, used for natural transformation experiments, was constructed by cloning a 6  
368 kb-long fragment consisting of the *legk2::kan* gene (78) and 2 kb of its flanking regions in pJET1.2/blunt  
369 cloning vector (ThermoFisher) according to the manufacturer's instructions. All the mutants generated in this  
370 study are derived from *L. pneumophila* Paris or *L. pneumophila* Paris *rocC<sub>TAA</sub>*. All the genes suspected to be  
371 involved in natural transformation were deleted by replacement with a kanamycin resistance gene. To do so,  
372 the upstream (PCRA, 2 kB) and downstream (PCRC, 2 kB) regions of each suspected genes were amplified  
373 respectively with the primers pairs X\_P1/X\_P2-tail-pKD4 and X\_P3-tail-pKD4/X\_P4 (where X designated the  
374 genes to be deleted). X\_P2-tail-pKD4 and X\_P3-tail-pKD4 carrying 30-nucleotide sequences complementary  
375 to the ends of the kanamycin cassette. This complementarity was used to assemble PCRA and PCRC to the  
376 kanamycin resistance cassette (PCRB, 1,490 kB amplified from plasmid pGEMPKD4 (31) with primers pair  
377 pKD4\_P1/pKD4\_P2) by overlap extension PCR. Overlapping PCRs were naturally transformed in the  
378 desired strain. Transformants were selected on CYE supplemented with kanamycin (15  $\mu$ g/mL). Integration  
379 of the kan cassette at the correct locus was finally verified by colony PCR. Plasmids p1890F and p0681F,  
380 encoding the FLAG-tagged PilA<sub>2</sub> and PilE, were constructed by amplifying *lpp1890* (*pilA<sub>2</sub>*) and *lpp0681*  
381 (*pilE*) with primers *lpp1890-F/lpp1890F-R* and *lpp0681-F/lpp0681F-R*, respectively. The PCR products and  
382 the recipient plasmid pMMB207C were digested with *HindIII/BamHI* and ligated to place the genes under the  
383 Ptac promoter. All strains, plasmids and oligonucleotides are listed in Table S1.

#### 384 *Generation of transposon insertion mutants library of Legionella pneumophila*

385 Transposon-based random mutagenesis was performed as previously described (79) by conjugative delivery  
386 of the Himar1-based transposon suicide vector pBT20 from the donor strain *E. coli* MFDpir to the recipient  
387 strain of *L. pneumophila* to be mutagenized. To do so, both bacteria were cultivated overnight at 37°C with

388 shaking in their corresponding liquid media : 7.5 mL LB broth containing 100 µg/mL ampicillin and 1% DAP  
389 for *E. coli* and 15 mL standard AYE medium for *L. pneumophila*. Once in stationary phase (i.e; DO~5), the *L.*  
390 *pneumophila* and *E. coli* cultures were concentrated by centrifugation (5,000 g, 10 min) and cell pellets were  
391 resuspended respectively in 1.5 mL sterile water and 0.750 mL sterile PBS. To promote cell-to-cell contacts  
392 and the subsequent conjugation, both concentrated cultures were mixed together by pipetting, and spotted  
393 on CYE plates without iron and cystein but supplemented with DAP (CYED) (79) until the sample was  
394 exhausted. Plates were incubated at 37°C for 5 to 6 h. All the spots were resuspended in sterile water and  
395 used to inoculate transconjugants-selective plates (i.e., CYE plates supplemented with 10 µg/mL of  
396 gentamicin). In parallel, the suspension was ten-fold diluted and spotted onto transconjugants-selective  
397 plates to evaluate the number of mutants in the library. After 72 h of incubation at 37°C, mutant library was  
398 obtained by collecting all colonies from the plates and resuspending them in AYE-15% glycerol. The  
399 suspension was aliquoted and stored at -80°C until its use for a Tn-seq screen. This library, called "initial  
400 isolation" is named sample XRCCR13.

#### 401 *Natural transformation Tn-seq screen*

402 Transposon mutants of *L. pneumophila* HL77S were screened for their ability to undergo transformation. To  
403 avoid a bottleneck effect, a volume of the -80°C frozen library containing ten times the number of mutants in  
404 the library was spotted on a CYE plate supplemented with gentamicin (10 µg/mL) and streptomycin (50 µg/  
405 mL) to obtain exponentially growing cells. After 24 h of incubation at 37°C, fresh bacteria from the spot were  
406 resuspended in AYE to an OD~0.2. This suspension was used to perform transformation assays using 2 µg/  
407 mL of either pGEM-ihfB-kan or pGET1.2-legK2-kan as transforming DNA, both conferring resistance to  
408 kanamycin. For both transforming DNA, the transformation screen was conducted in duplicate. The  
409 suspensions were cultivated at 30°C with shaking for 40 h to ensure that bacteria undergo transformation  
410 and achieve an OD~5. These conditions were expected to give about ~10<sup>5</sup> transformants/mL for the "DNA"  
411 conditions. Regarding the "no DNA" condition, cultures were diluted in AYE to obtain the same number of  
412 CFUs on non-selective plates than the output condition on selective plates. Each sample ("DNA" and "no  
413 DNA") was used to inoculate respectively nonselective (i.e., CYE) and transformants-selective (i.e., CYE  
414 supplemented with 20 µg/mL of kanamycin) plates. In parallel, "no DNA" samples were tenfold diluted and  
415 spotted on nonselective plates to determine transformation frequencies as mentioned above. After 72 h of  
416 incubation at 37°C, colonies were collected from the plates and resuspended in AYE-15% glycerol until the  
417 preparation of DNA libraries. The "no DNA" condition is also referred as the "second isolation" used in the  
418 fitness analysis.

#### 419 *DNA library preparation and sequencing*

420 Libraries were prepared as previously described (79). Mutant libraries from the -80°C frozen stock were  
421 thawed and centrifuged at maximum speed to pellet them. gDNA extraction was carried out directly on the  
422 pellet cells with the Wizard Genomic DNA Purification Kit (Promega) according to manufacturer's  
423 instructions. ~30 µg of DNA were mechanically sheared by sonication using a Branson sonifier for 4 min (1  
424 sec on and 11 sec off; 20 % intensity) in 0,5-mL PCR tubes kept on ice. Small gDNA molecules were  
425 removed by mixing sonicated gDNA with 0.6X Agencourt Ampure XL magnetic beads (Beckman Coulter)

426 according to manufacturer's instructions. These treatments led to gDNA fragments being between 300 and  
427 1000 pb. Homopolymeric cytosine-tails (C-tail) were then added to the 3' ends of all fragments by incubation  
428 of 3 µg of size-selected DNA fragments with the recombinant terminal deoxynucleotidyl transferase (rTdT, 30  
429 U/µL, Promega) at 37°C for 1H, followed by heat inactivation at 75°C for 20 min. TdT reagents were then  
430 removed by purifying the TdT reaction mixture with 1X of Ampure XL beads. To amplify transposon junctions,  
431 a first-round of PCR (PCR1) was performed in a final volume of 50 µL by mixing 500 ng C-tailed DNA, 1 µL  
432 biotinylated pBT20-PCR1 primer (30 µM), 3 µL olj376 primer (30 µM), 2.5 µL dNTPs (10 mM), 10 µL Q5  
433 reaction buffer and 0.75 µL Q5 High-Fidelity DNA Polymerase (New England Biolabs). PCR1 products were  
434 purified using 1X Ampure beads. Biotinylated and purified PCR1 products were then selectively captured  
435 using Dynabeads M-280 Streptavidin (Invitrogen) according to manufacturer's instructions. A second-round  
436 of PCR was carried out in a final volume of 50 µL by resuspending Dynabeads (which have PCR1 products  
437 bound to them) in the pre-prepared PCR2 reaction mix constituted of 1 µL pBT20-PCR2 primer (30 µM), 1µL  
438 TdT\_index\_X primer (30 µM), 2.5 µL dNTPs (10 mM), 10 µL Q5 reaction buffer and 0.75 µL Q5 High-Fidelity  
439 DNA Polymerase. PCR2 products were purified with 1X Ampure XL beads. The obtained libraries were  
440 sequenced on an Illumina HiSeq 4000 in single-end 50 pb using the custom sequencing primer Read1TnLp.  
441 Samples and conditions are listed in Dataset S1. Essentiality analysis was performed using reads from  
442 sample XRCR13. Fitness analysis was performed by comparing reads from samples XRCR24, 26, 36 and  
443 38 (no DNA conditions from the transformation screen) versus XRCR13. Analysis of transformation was  
444 performed by comparing samples XRCR27, 39 (legK2::kan transforming DNA) vs samples XRCR26, 38 (no  
445 DNA control) and XRCR25, 37 (ihfB::kan transforming DNA) to samples XRCR24, 36 (no DNA control). Raw  
446 sequencing reads were deposited to the European Nucleotide Archive (<https://www.ebi.ac.uk/ena/>) under the  
447 study accession number PRJEB40244.

#### 448 *Tn-seq data analysis*

449 For each condition, 10-50 million reads were obtained and trimmed with tools from the Galaxy's project  
450 public server. Fastx\_clipper was used to cut poly-C tails and remove short reads (<15 pb after polyC  
451 clipping). Then, reads were filtered by quality using trimmomatic and quality checked with FastQC. Trimmed  
452 reads in the fastq output file were mapped to the reference genome using Tn-seq software TPP (Tn-seq pre-  
453 processor) (80). Output wig files from TPP were used to perform essentiality analysis using Transit (81).  
454 Single-condition essentiality analysis was performed with the hmm (46) or Gumbel (45) methods. Conditional  
455 essentiality analysis was performed with the "resampling" method according to the Transit software  
456 documentation. Complete genome sequence of HL-0709-3014 was obtained (see *Genome sequence and*  
457 *accession numbers*) and annotated with Prokka (82). An orthology search was carried out between the  
458 strains of *L. pneumophila* HL77S, Paris and Philadelphia-1 using the orthology detection eggNOG mapper  
459 (83) and COG and KEGG number were assigned to each gene.

#### 460 *Transformation assays*

461 Natural transformation assays were conducted differently depending on the genetic background of *L.*  
462 *pneumophila* strain used: (1) For the constitutively transformable *rocC<sub>TAA</sub>* strains, natural transformation was  
463 conducted on solid medium at 37°C as follows. The strains were streaked on CYE solid medium from a

464 frozen stock culture and incubated for 72 h at 37°C. The strains were then restreaked on a new CYE plate  
465 and incubated overnight at 37°C to obtain freshly growing cells. Bacteria were resuspended in sterile water  
466 to an OD<sub>600</sub> of 1 to obtain a suspension of 1.10<sup>9</sup> colony forming units (CFUs) per milliliter. 10 µL of the  
467 suspensions (~1.10<sup>7</sup> CFU) were spotted on CYE with 1.5 µg of transforming DNA. Once the spots are  
468 absorbed by the agar, plates were incubated at 37°C for 24 h. Each spot was resuspended in 200 µL sterile  
469 water and used to perform tenfold serial dilutions which were then plated on nonselective medium and  
470 selective medium. Plates were incubated at 37°C for 72 h. Finally, transformation frequencies were  
471 calculated as the ratio of the number of CFUs counted on selective medium divided by the number of CFUs  
472 counted on nonselective medium. For all the *roc*<sub>TAA</sub> strains, “rpsL” PCR product was used as transforming  
473 DNA. This transforming DNA is obtained by amplificating the 2-kB regions upstream and downstream the  
474 *rpsL* single point mutation conferring resistance to streptomycin (PCR primers pairs rpsL\_F/rpsL\_R).  
475 Transformation experiments on strains bearing the p0681F and p1890F plasmids were performed the same  
476 way, using CYE plates containing different concentration of IPTG. (2) For the non-constitutively  
477 transformable strains of *L. pneumophila*, transformation was realized in liquid medium at 30°C as follows:  
478 strains were streaked on CYE solid medium from a frozen stock culture and incubated for 72 h at 37°C and  
479 then restreaked on a new CYE plate and incubated overnight at 37°C. Fresh bacteria were resuspended in 3  
480 mL of AYE in 13-mL tubes to an OD~0.2 with 2 µg of transforming DNA and cultivated at 30°C with shaking  
481 for 24 h. Tenfold serial dilution of each culture was then performed and plated on nonselective medium and  
482 selective medium and incubated at 37°C for 72 h. Finally, transformation frequencies were determined as  
483 described above. (3) For *letA* mutants of constitutively and non-constitutively transformable strains of *L.*  
484 *pneumophila*: strains were streaked on CYE solid medium from a frozen stock culture and incubated for 72 h  
485 at 37°C and then restreaked on a new CYE plate and incubated overnight at 37°C. Fresh bacteria were  
486 resuspended in 3 mL of AYE in 13-mL tubes to an OD~0.2 and cultivated at 30°C with shaking until OD~2-4  
487 (corresponding to the competence phase of *L. pneumophila*). A volume corresponding to 1.10<sup>8</sup> bacteria was  
488 spotted on CYE plates with 1.5 µg the *rpsL* PCR product. The following steps were the same as for the  
489 transformation of constitutively transformable *roc*<sub>TAA</sub> strains as mentioned in (1).

#### 490 *Detection of extracellular pilin by Western-Blot*

491 Strains bearing plasmid p1890F were grown overnight at 37°C on CYE containing 500 µM IPTG, and were  
492 then resuspended in 2 mL AYE at an OD<sub>600</sub>~1.5. 1 mL of the suspension was then submitted to max-speed  
493 vortex agitation for 1 min, and centrifuged 15 min at 21,000 g and 4°C. Supernatants were recovered in a  
494 new tube and centrifuged again, while pellets were saved on ice. After centrifugation, 900 µL of supernatants  
495 were recovered and proteins were precipitated by adding 100 µL of Trichloroacetic Acid (TCA, final  
496 concentration of 10%). After 30 min of incubation on ice, a 15 min centrifugation at 21,000 g and 4°C was  
497 performed. Pellets were washed three times with acetone, dried at room temperature and resuspended with  
498 100 µL of Laemmli Sample Buffer 1X. Pellets previously saved on ice were resuspended with 150 µL of  
499 Sample Buffer 1X. Samples were then analyzed by Western-blot. Aliquots were boiled for 5 min and  
500 subjected to denaturing polyacrylamide gel electrophoresis. Proteins from SDS-polyacrylamide gels were  
501 electrophoretically transferred to nitrocellulose membranes (Schleicher and Schuell) and subsequently  
502 stained with Ponceau S (Sigma) to check the loading of the lanes. Membranes were incubated with  
503 monoclonal Anti-FLAG antibody (dilution 1:1000, Sigma F1804) as a primary antibody and an anti-mouse

504 peroxidase conjugate (dilution 1:50000, Sigma A0168) as secondary antibody. Nitrocellulose membranes  
505 were revealed with the SuperSignal® West Dura detection system (Pierce) and an imaging workstation  
506 equipped with a charge-coupled device camera (Thermo).

#### 507 *Determination of the DNA uptake ability*

508 The ability of the transformation-deficient mutants to uptake DNA was determined as follows: strains were  
509 inoculated in AYE media at an OD600 = 0.05 and tubes were incubated overnight under constant shaking at  
510 30°C. When OD600 = 0.9 was reached, 1 mL of each culture was centrifuged 3 min at 5000g, and pellets  
511 were resuspended in 200 µL ultrapure water containing 2 µg of pGEM-HYG1. This plasmid is non-replicative  
512 plasmid in *L. pneumophila* and, as it contains no homology with *L. pneumophila* genome, it cannot integrate  
513 by recombination either.. After 20 min of incubation at 37°C, tubes were centrifuged 3 min at 5000g and  
514 pellets were resuspended in 200 µL AYE liquid medium containing 10 Units of DNase I (Sigma). After 20 min  
515 of incubation at 37°C, DNase I was removed and bacteria were washed by two successive centrifugation 3  
516 min at 5000 g and resuspension in 1 mL of water. Pellets were finally resuspended in 100 µL ultrapure water,  
517 and incubate 30 min at 65°C to complete DNase I inactivation and kill bacteria. DNA uptake ability of each  
518 mutants was then determined by PCR, using two couples of primers amplifying on the one hand the  
519 chromosomal *mreB* gene (*lpp0873*) and on the other hand a part of pGEM-HYG1, giving respectively PCR  
520 products of 1194 pb (*mreB*seqF/*mreB*seqR) and 1657 pb (M13F(-47)/M13R(-48)).

#### 521 *Microscopy*

522 Bacteria expressing the FLAG-tagged pilins were grown as spots on CYE plates with 0.5 mM IPTG for 24 h  
523 at 37°C. Bacteria were gently collected with a pipette tip. In order to limit shearing and breaking of the pilus,  
524 the pipette tip was left standing an eppendorf tube with 1 mL of water for a few minutes. Once the collected  
525 bacterial culture is starting to dissociate and falling off from the tip, the bacterial pellet is resuspended gently  
526 by slowly pipetting up and down. The collected 1 mL suspensions were centrifuged 3 min at 5000 g and  
527 pellets were gently resuspended in 300 µL PBS Formaldehyde 3.7% and incubated at room temperature for  
528 30 minutes. Acid-washed (ethanol/HCl 1M) glass coverslips were coated with poly-L-lysine by immersion in a  
529 poly-L-lysine 0.01% solution in distilled water (Sigma-Aldrich) for 5 minutes. Fixed bacteria in PBS  
530 Formaldehyde 3.7% were pipetted (250 µl) on the air-dried coverslips and let to settle and stick to the  
531 coverslips for about 30 minutes. Coverslips were then washed twice with PBS, and incubated with  
532 monoclonal anti-FLAG M2 fluorescein conjugates at 1/200 in PBS for 1h. Coverslips were then washed twice  
533 with PBS and DNA was labeled using Hoechst 33288 (12 µg/mL in PBS) 1 h. Coverslips were washed twice  
534 in PBS and mounted using 8 µL of mounting solution (DAPCO). After an overnight incubation at 4°C slides  
535 were observed and imaged with an epifluorescence microscope (Zeiss Axioplan 2).

#### 536 *Genome sequence and raw reads accession numbers*

537 The complete genome of isolate HL-0709-3014 was obtained using Illumina MiSeq paired end reads from  
538 previously available SRA sample ERS1305867 and long reads from Oxford Nanopore sequencing on a

539 MinION sequencer according to manufacturer's instructions (Oxford Nanopore). Illumina and Nanopore  
540 reads were then used for short reads/long reads hybrid assembly using Unicycler v0.4.6 (84). The complete  
541 genome of isolate HL-0709-3014 is available under accession numbers CP048618.1 (chromosome) and  
542 CP048619.1 (plasmid). The strain is listed under the name *Legionella pneumophila* strain ERS1305867  
543 (BioProject: PRJEB15241; BioSample: SAMEA4394418). Raw sequencing reads of the Tn-seq samples are  
544 available at the European Nucleotide Archive (<https://www.ebi.ac.uk/ena/>) under the study accession number  
545 PRJEB40244.

## 546 **Acknowledgements**

547 We warmly thank Christophe Ginevra (Centre National de Référence des Légionelles) for kindly providing  
548 Nanopore sequencing reads and full genome assembly of HL-0709-3014. We also thank Chloé Vallantin for  
549 technical assistance with clinical isolates and Annelise Chapalain and Johann Guillemot for providing mouse  
550 and human monocytes cultures and helpful advice on infection with *L. pneumophila*. We thank Vladimir  
551 Shevchik for his insight into type IV secretion and minor pills. We acknowledge Laetitia Attaiech and Maria-  
552 Halima Laaberki for their critical assessment of the manuscript. This work was supported by the LABEX  
553 ECOFECT (ANR-11-LABX-0048) of Université de Lyon, within the program "Investissements d'Avenir" (ANR-  
554 11-IDEX-0007) operated by the French National Research Agency (ANR).

555 LH, PAJ and BCG designed and performed experiments, and analyzed data. LH and XC analyzed Tn-seq  
556 data. LH and XC wrote the manuscript. XC conceptualized and supervised the project.

## 557 **References**

1. Molmeret M, Horn M, Wagner M, Santic M, Abu Kwaik Y. 2005. Amoebae as training grounds for intracellular bacterial pathogens. *Appl Environ Microbiol* 71:20–28.
2. Rowbotham TJ. 1980. Preliminary report on the pathogenicity of *Legionella pneumophila* for freshwater and soil amoebae. *J Clin Pathol* 33:1179–1183.
3. Fields BS, Benson RF, Besser RE. 2002. *Legionella* and Legionnaires' disease: 25 years of investigation. *Clin Microbiol Rev* 15:506–526.
4. Nash TW, Libby DM, Horwitz MA. 1984. Interaction between the legionnaires' disease bacterium (*Legionella pneumophila*) and human alveolar macrophages. Influence of antibody, lymphokines, and hydrocortisone. *J Clin Invest* 74:771–82.
5. Gao LY, Harb OS, Abu Kwaik Y. 1997. Utilization of similar mechanisms by *Legionella pneumophila* to parasitize two evolutionarily distant host cells, mammalian macrophages and protozoa. *Infect Immun* 65:4738–4746.
6. Vogel JP, Andrews HL, Wong SK, Isberg RR. 1998. Conjugative transfer by the virulence system of *Legionella pneumophila*. *Science* 279:873–6.
7. Segal G, Purcell M, Shuman HA. 1998. Host cell killing and bacterial conjugation require overlapping sets of genes within a 22-kb region of the *Legionella pneumophila* genome. *Proc Natl Acad Sci USA* 95:1669–74.
8. Zhu W, Banga S, Tan Y, Zheng C, Stephenson R, Gately J, Luo Z-Q. 2011. Comprehensive identification of protein substrates of the Dot/Icm type IV transporter of *Legionella pneumophila*. *PLoS ONE* 6:e17638.
9. Burstein D, Zusman T, Degtyar E, Viner R, Segal G, Pupko T. 2009. Genome-Scale Identification of *Legionella pneumophila* Effectors Using a Machine Learning Approach. *PLoS Pathog* 5:e1000508.

10. Chien M, Morozova I, Shi S, Sheng H, Chen J, Gomez SM, Asamani G, Hill K, Nuara J, Feder M, Rineer J, Greenberg JJ, Steshenko V, Park SH, Zhao B, Teplitskaya E, Edwards JR, Pampou S, Georghiou A, Chou I-C, Iannuccilli W, Ulz ME, Kim DH, Geringer-Sameth A, Goldsberry C, Morozov P, Fischer SG, Segal G, Qu X, Rzhetsky A, Zhang P, Cayanis E, De Jong PJ, Ju J, Kalachikov S, Shuman HA, Russo JJ. 2004. The genomic sequence of the accidental pathogen *Legionella pneumophila*. *Science* 305:1966–1968.
11. Cazalet C, Rusniok C, Brüggemann H, Zidane N, Magnier A, Ma L, Tichit M, Jarraud S, Bouchier C, Vandenesch F, Kunst F, Etienne J, Glaser P, Buchrieser C. 2004. Evidence in the *Legionella pneumophila* genome for exploitation of host cell functions and high genome plasticity. *Nat Genet* 36:1165–1173.
12. Lurie-Weinberger MN, Gomez-Valero L, Merault N, Glöckner G, Buchrieser C, Gophna U. 2010. The origins of eukaryotic-like proteins in *Legionella pneumophila*. *Int J Med Microbiol* 300:470–481.
13. David S, Rusniok C, Mentasti M, Gomez-Valero L, Harris SR, Lechat P, Lees J, Ginevra C, Glaser P, Ma L, Bouchier C, Underwood A, Jarraud S, Harrison TG, Parkhill J, Buchrieser C. 2016. Multiple major disease-associated clones of *Legionella pneumophila* have emerged recently and independently. *Genome Res* 26:1555–1564.
14. Sánchez-Busó L, Comas I, Jorques G, González-Candelas F. 2014. Recombination drives genome evolution in outbreak-related *Legionella pneumophila* isolates. *Nat Genet* 46:1205–1211.
15. David S, Sánchez-Busó L, Harris SR, Marttinen P, Rusniok C, Buchrieser C, Harrison TG, Parkhill J. 2017. Dynamics and impact of homologous recombination on the evolution of *Legionella pneumophila*. *PLoS Genet* 13:e1006855.
16. Stone BJ, Kwai YA. 1999. Natural competence for DNA transformation by *Legionella pneumophila* and its association with expression of type IV pili. *J Bacteriol* 181:1395–1402.
17. Dubnau D, Blokesch M. 2019. Mechanisms of DNA Uptake by Naturally Competent Bacteria. *Annu Rev Genet* 53:217–237.
18. Johnsborg O, Eldholm V, Håvarstein LS. 2007. Natural genetic transformation: prevalence, mechanisms and function. *Research in Microbiology* 158:767–778.
19. Piepenbrink KH. 2019. DNA Uptake by Type IV Filaments. *Front Mol Biosci* 6.
20. Ellison CK, Dalia TN, Vidal Ceballos A, Wang JC-Y, Biais N, Brun YV, Dalia AB. 2018. Retraction of DNA-bound type IV competence pili initiates DNA uptake during natural transformation in *Vibrio cholerae*. *Nat Microbiol* 3:773–780.
21. Seitz P, Pezeshgi Modarres H, Borgeaud S, Bulushev RD, Steinbock LJ, Radenovic A, Dal Peraro M, Blokesch M. 2014. ComEA is essential for the transfer of external DNA into the periplasm in naturally transformable *Vibrio cholerae* cells. *PLoS Genet* 10:e1004066.
22. Hepp C, Maier B. 2016. Kinetics of DNA uptake during transformation provide evidence for a translocation ratchet mechanism. *Proc Natl Acad Sci USA* 113:12467–12472.
23. Draskovic I, Dubnau D. 2005. Biogenesis of a putative channel protein, ComEC, required for DNA uptake: membrane topology, oligomerization and formation of disulphide bonds. *Mol Microbiol* 55:881–896.
24. Bergé M, Mortier-Barrière I, Martin B, Claverys J-P. 2003. Transformation of *Streptococcus pneumoniae* relies on DprA- and RecA-dependent protection of incoming DNA single strands. *Mol Microbiol* 50:527–536.
25. Attaiech L, Olivier A, Mortier-Barrière I, Soulet A-L, Granadel C, Martin B, Polard P, Claverys J-P. 2011. Role of the single-stranded DNA-binding protein SsbB in pneumococcal transformation: maintenance of a reservoir for genetic plasticity. *PLoS Genet* 7:e1002156.
26. Mortier-Barrière I, Velten M, Dupaigne P, Mirouze N, Piétremont O, McGovern S, Fichant G, Martin B, Noirot P, Le Cam E, Polard P, Claverys J-P. 2007. A key presynaptic role in transformation for a widespread bacterial protein: DprA conveys incoming ssDNA to RecA. *Cell* 130:824–36.
27. Nero TM, Dalia TN, Wang JC-Y, Kysela DT, Bochman ML, Dalia AB. 2018. ComM is a hexameric helicase that promotes branch migration during natural transformation in diverse Gram-negative species. *Nucleic Acids Res* 46:6099–6111.
28. Johnston C, Martin B, Fichant G, Polard P, Claverys J-P. 2014. Bacterial transformation: distribution, shared mechanisms and divergent control. *Nat Rev Microbiol* 12:181–196.



29. Charpentier X, Kay E, Schneider D, Shuman HA. 2011. Antibiotics and UV Radiation Induce Competence for Natural Transformation in *Legionella pneumophila*. *J Bacteriol* 193:1114–1121.
30. Buchrieser C, Charpentier X. 2013. Induction of Competence for Natural Transformation in *Legionella pneumophila* and Exploitation for Mutant Construction. *Methods Mol Biol* 954:183–195.
31. Attaiech L, Boughammoura A, Brochier-Armanet C, Allatif O, Peillard-Fiorente F, Edwards RA, Omar AR, MacMillan AM, Glover M, Charpentier X. 2016. Silencing of natural transformation by an RNA chaperone and a multitarget small RNA. *Proc Natl Acad Sci USA* 113:8813–8818.
32. Durieux I, Ginevra C, Attaiech L, Picq K, Juan P-A, Jarraud S, Charpentier X. 2019. Diverse conjugative elements silence natural transformation in *Legionella* species. *PNAS* 116:18613–18618.
33. Kessler A, Schell U, Sahr T, Tiaden A, Harrison C, Buchrieser C, Hilbi H. 2013. The *Legionella pneumophila* orphan sensor kinase LqsT regulates competence and pathogen-host interactions as a component of the LAI-1 circuit. *Environ Microbiol* 15:646–662.
34. Attaiech L, Charpentier X. 2017. Silently transformable: the many ways bacteria conceal their built-in capacity of genetic exchange. *Curr Genet* 63:451–455.
35. van Opijnen T, Camilli A. 2012. A fine scale phenotype-genotype virulence map of a bacterial pathogen. *Genome Res* 22:2541–2551.
36. Langridge GC, Phan M-D, Turner DJ, Perkins TT, Parts L, Haase J, Charles I, Maskell DJ, Peters SE, Dougan G, Wain J, Parkhill J, Turner AK. 2009. Simultaneous assay of every *Salmonella Typhi* gene using one million transposon mutants. *Genome Res* 19:2308–2316.
37. Gawronski JD, Wong SMS, Giannoukos G, Ward DV, Akerley BJ. 2009. Tracking insertion mutants within libraries by deep sequencing and a genome-wide screen for *Haemophilus* genes required in the lung. *Proc Natl Acad Sci USA* 106:16422–16427.
38. Goodman AL, McNulty NP, Zhao Y, Leip D, Mitra RD, Lozupone CA, Knight R, Gordon JI. 2009. Identifying genetic determinants needed to establish a human gut symbiont in its habitat. *Cell Host Microbe* 6:279–289.
39. van Opijnen T, Bodi KL, Camilli A. 2009. Tn-seq: high-throughput parallel sequencing for fitness and genetic interaction studies in microorganisms. *Nat Methods* 6:767–772.
40. Cain AK, Barquist L, Goodman AL, Paulsen IT, Parkhill J, van Opijnen T. 2020. A decade of advances in transposon-insertion sequencing. *Nat Rev Genet* 21:526–540.
41. Chao MC, Abel S, Davis BM, Waldor MK. 2016. The design and analysis of transposon insertion sequencing experiments. *Nature Reviews Microbiology* 14:119–128.
42. Shames SR, Liu L, Havey JC, Schofield WB, Goodman AL, Roy CR. 2017. Multiple *Legionella pneumophila* effector virulence phenotypes revealed through high-throughput analysis of targeted mutant libraries. *Proc Natl Acad Sci USA* 114:E10446–E10454.
43. Park JM, Ghosh S, O'Connor TJ. 2020. Combinatorial selection in amoebal hosts drives the evolution of the human pathogen *Legionella pneumophila*. *Nat Microbiol* 1–11.
44. Sexton JA, Vogel JP. 2004. Regulation of hypercompetence in *Legionella pneumophila*. *J Bacteriol* 186:3814–25.
45. DeJesus MA, Zhang YJ, Sasseti CM, Rubin EJ, Sacchettini JC, Ioerger TR. 2013. Bayesian analysis of gene essentiality based on sequencing of transposon insertion libraries. *Bioinformatics* 29:695–703.
46. DeJesus MA, Ioerger TR. 2013. A Hidden Markov Model for identifying essential and growth-defect regions in bacterial genomes from transposon insertion sequencing data. *BMC Bioinformatics* 14:303.
47. Luo H, Lin Y, Gao F, Zhang C-T, Zhang R. 2014. DEG 10, an update of the database of essential genes that includes both protein-coding genes and noncoding genomic elements. *Nucleic Acids Res* 42:D574–D580.
48. Juan P-A, Attaiech L, Charpentier X. 2015. Natural transformation occurs independently of the essential actin-like MreB cytoskeleton in *Legionella pneumophila*. *Scientific Reports* 5:16033.
49. Charpentier X, Faucher SP, Kalachikov S, Shuman HA. 2008. Loss of RNase R Induces Competence Development in *Legionella pneumophila*. *J Bacteriol* 190:8126–36.
50. Brunel R, Charpentier X. 2016. Trans-translation is essential in the human pathogen *Legionella pneumophila*. *Sci Rep* 6:37935.

51. Beaber JW, Hochhut B, Waldor MK. 2002. Genomic and functional analyses of SXT, an integrating antibiotic resistance gene transfer element derived from *Vibrio cholerae*. *J Bacteriol* 184:4259–4269.
52. Sinha S, Mell JC, Redfield RJ. 2012. Seventeen Sxy-Dependent Cyclic AMP Receptor Protein Site-Regulated Genes Are Needed for Natural Transformation in *Haemophilus influenzae*. *J Bacteriol* 194:5245–5254.
53. Ohnishi H, Mizunoe Y, Takade A, Tanaka Y, Miyamoto H, Harada M, Yoshida S. 2004. *Legionella dumoffii* DjlA, a member of the DnaJ family, is required for intracellular growth. *Infect Immun* 72:3592–3603.
54. Pernestig AK, Melefors O, Georgellis D. 2001. Identification of UvrY as the cognate response regulator for the BarA sensor kinase in *Escherichia coli*. *J Biol Chem* 276:225–231.
55. Marutani M, Taguchi F, Ogawa Y, Hossain MM, Inagaki Y, Toyoda K, Shiraishi T, Ichinose Y. 2008. Gac two-component system in *Pseudomonas syringae* pv. *tabaci* is required for virulence but not for hypersensitive reaction. *Mol Genet Genomics* 279:313–322.
56. Hammer BK, Tateda ES, Swanson MS. 2002. A two-component regulator induces the transmission phenotype of stationary-phase *Legionella pneumophila*. *Mol Microbiol* 44:107–118.
57. Gal-Mor O, Segal G. 2003. The *Legionella pneumophila* GacA homolog (LetA) is involved in the regulation of *icm* virulence genes and is required for intracellular multiplication in *Acanthamoeba castellanii*. *Microb Pathog* 34:187–194.
58. Lynch D, Fieser N, Glöggler K, Forsbach-Birk V, Marre R. 2003. The response regulator LetA regulates the stationary-phase stress response in *Legionella pneumophila* and is required for efficient infection of *Acanthamoeba castellanii*. *FEMS Microbiol Lett* 219:241–248.
59. Shi C, Forsbach-Birk V, Marre R, McNealy TL. 2006. The *Legionella pneumophila* global regulatory protein LetA affects DotA and Mip. *Int J Med Microbiol* 296:15–24.
60. Bachman MA, Swanson MS. 2004. The LetE protein enhances expression of multiple LetA/LetS-dependent transmission traits by *Legionella pneumophila*. *Infect Immun* 72:3284–3293.
61. Molofsky AB, Swanson MS. 2003. *Legionella pneumophila* CsrA is a pivotal repressor of transmission traits and activator of replication. *Mol Microbiol* 50:445–461.
62. Hofreuter D, Odenbreit S, Haas R. 2001. Natural transformation competence in *Helicobacter pylori* is mediated by the basic components of a type IV secretion system. *Mol Microbiol* 41:379–391.
63. Jacobsen T, Bardiaux B, Francetic O, Izadi-Pruneyre N, Nilges M. 2020. Structure and function of minor pilins of type IV pili. *Med Microbiol Immunol* 209:301–308.
64. Giltner CL, Nguyen Y, Burrows LL. 2012. Type IV Pilin Proteins: Versatile Molecular Modules. *Microbiol Mol Biol Rev* 76:740–772.
65. Neuhaus A, Selvaraj M, Salzer R, Langer JD, Kruse K, Kirchner L, Sanders K, Daum B, Averhoff B, Gold VAM. 2020. Cryo-electron microscopy reveals two distinct type IV pili assembled by the same bacterium. 1. *Nature Communications* 11:2231.
66. Stone BJ, Abu Kwaik Y. 1998. Expression of multiple pili by *Legionella pneumophila*: identification and characterization of a type IV pilin gene and its role in adherence to mammalian and protozoan cells. *Infect Immun* 66:1768–1775.
67. Imam S, Chen Z, Roos DS, Pohlschröder M. 2011. Identification of Surprisingly Diverse Type IV Pili, across a Broad Range of Gram-Positive Bacteria. *PLOS ONE* 6:e28919.
68. Korotkov KV, Hol WGJ. 2008. Structure of the GspK-GspI-GspJ complex from the enterotoxigenic *Escherichia coli* type 2 secretion system. *Nat Struct Mol Biol* 15:462–468.
69. Cisneros DA, Bond PJ, Pugsley AP, Campos M, Francetic O. 2012. Minor pseudopilin self-assembly primes type II secretion pseudopilus elongation. *The EMBO Journal* 31:1041–1053.
70. Karuppiah V, Thistlethwaite A, Derrick JP. 2016. Structures of type IV pilins from *Thermus thermophilus* demonstrate similarities with type II secretion system pseudopilins. *J Struct Biol* 196:375–384.
71. Alm RA, Boder AJ, Free PD, Mattick JS. 1996. Identification of a novel gene, *pilZ*, essential for type 4 fimbrial biogenesis in *Pseudomonas aeruginosa*. *J Bacteriol* 178:46–53.
72. Amikam D, Galperin MY. 2006. PilZ domain is part of the bacterial c-di-GMP binding protein. *Bioinformatics* 22:3–6.

73. Merighi M, Lee VT, Hyodo M, Hayakawa Y, Lory S. 2007. The second messenger bis-(3'-5')-cyclic-GMP and its PilZ domain-containing receptor Alg44 are required for alginate biosynthesis in *Pseudomonas aeruginosa*. *Mol Microbiol* 65:876–895.
74. Y M, Rp R, K O, Yq H, Bl J, Jx F, Jl T, Jm D. 2008. The role of PilZ domain proteins in the virulence of *Xanthomonas campestris* pv. *campestris*. *Mol Plant Pathol* 9:819–824.
75. Guzzo CR, Salinas RK, Andrade MO, Farah CS. 2009. PILZ protein structure and interactions with PILB and the FIMX EAL domain: implications for control of type IV pilus biogenesis. *J Mol Biol* 393:848–866.
76. Ferrières L, Hémerly G, Nham T, Guérout A-M, Mazel D, Beloin C, Ghigo J-M. 2010. Silent Mischief: Bacteriophage Mu Insertions Contaminate Products of *Escherichia coli* Random Mutagenesis Performed Using Suicidal Transposon Delivery Plasmids Mobilized by Broad-Host-Range RP4 Conjugative Machinery. *J Bacteriol* 192:6418–6427.
77. Kulasekara HD, Ventre I, Kulasekara BR, Lazdunski A, Filloux A, Lory S. 2005. A novel two-component system controls the expression of *Pseudomonas aeruginosa* fimbrial cup genes. *Mol Microbiol* 55:368–380.
78. Hervet E, Charpentier X, Vianney A, Lazzaroni J-C, Gilbert C, Atlan D, Doublet P. 2011. Protein Kinase LegK2 Is a Type IV Secretion System Effector Involved in Endoplasmic Reticulum Recruitment and Intracellular Replication of *Legionella pneumophila*  $\varphi$ . *Infect Immun* 79:1936–1950.
79. Hardy L, Charpentier X. 2019. Querying *Legionella* Genomes Using Transposition-Sequencing. *Methods Mol Biol* 1921:107–122.
80. Long JE, DeJesus M, Ward D, Baker RE, Ioerger T, Sasseti CM. 2015. Identifying essential genes in *Mycobacterium tuberculosis* by global phenotypic profiling. *Methods Mol Biol* 1279:79–95.
81. DeJesus MA, Ambadipudi C, Baker R, Sasseti C, Ioerger TR. 2015. TRANSIT--A Software Tool for Himar1 TnSeq Analysis. *PLoS Comput Biol* 11:e1004401.
82. Seemann T. 2014. Prokka: rapid prokaryotic genome annotation. *Bioinformatics* 30:2068–2069.
83. Huerta-Cepas J, Forslund K, Coelho LP, Szklarczyk D, Jensen LJ, von Mering C, Bork P. 2017. Fast Genome-Wide Functional Annotation through Orthology Assignment by eggNOG-Mapper. *Mol Biol Evol* 34:2115–2122.
84. Wick RR, Judd LM, Gorrie CL, Holt KE. 2017. Unicycler: Resolving bacterial genome assemblies from short and long sequencing reads. *PLoS Comput Biol* 13:e1005595.

558 **Figures**

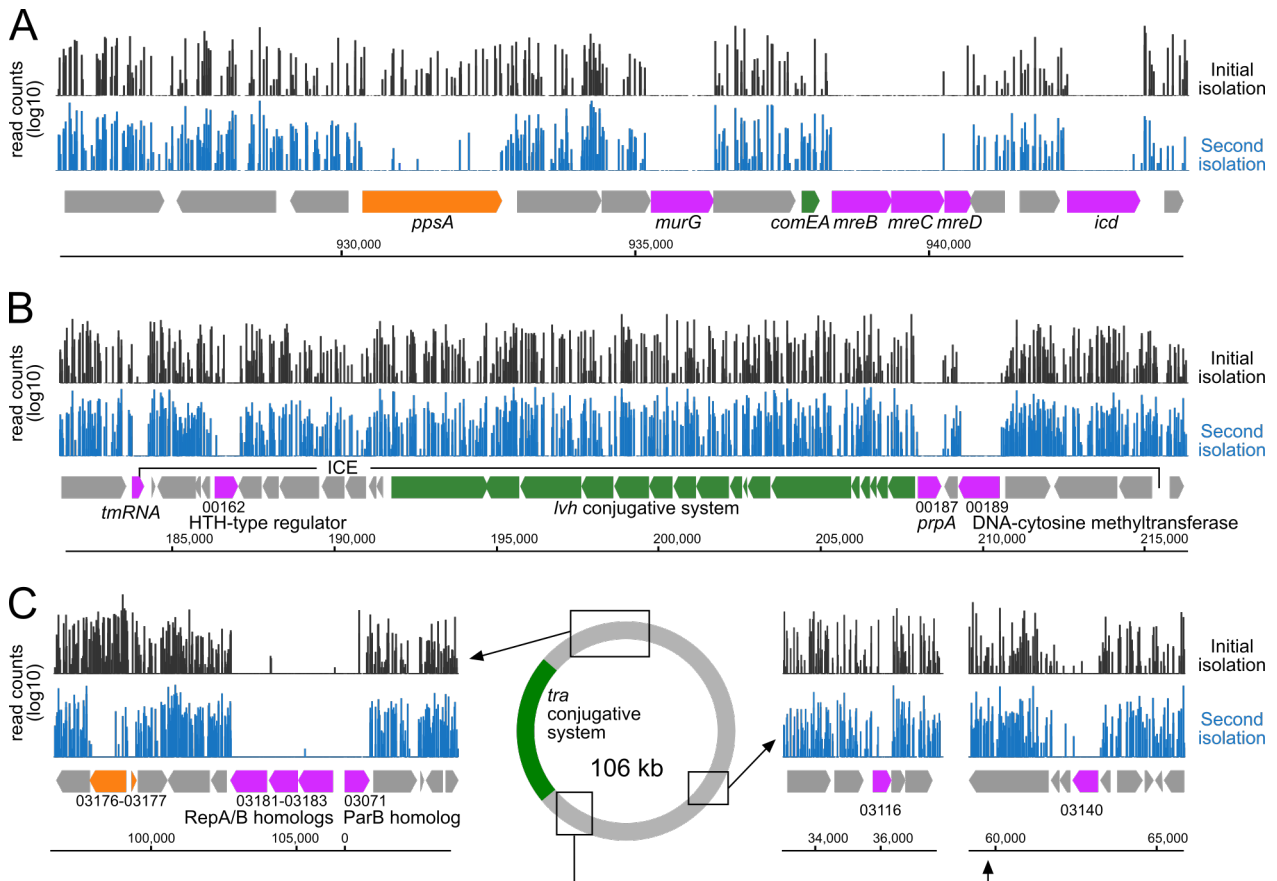

559 **Figure 1.** Tn-seq analysis of *L. pneumophila* strain HL77S. A) Log10 reads counts of transposon insertions  
 560 after initial library isolation (black) and second isolation (blue). Genes identified as essential are colored in  
 561 magenta, fitness determinants are colored in orange. Other genes of interest are colored in green. B)  
 562 Transposon-insertion coverage in a region encompassing an integrative conjugative element (ICE) harboring  
 563 essential genes (magenta) and genes encoding a conjugative system (green). The duplicated sequence  
 564 gcggttcgattcccgccgctccacca of the *tmRNA* and located 66 kb away delineate the boundaries of the ICE. C)  
 565 Essential genes and fitness determinants in the conjugative plasmid of HL77S.

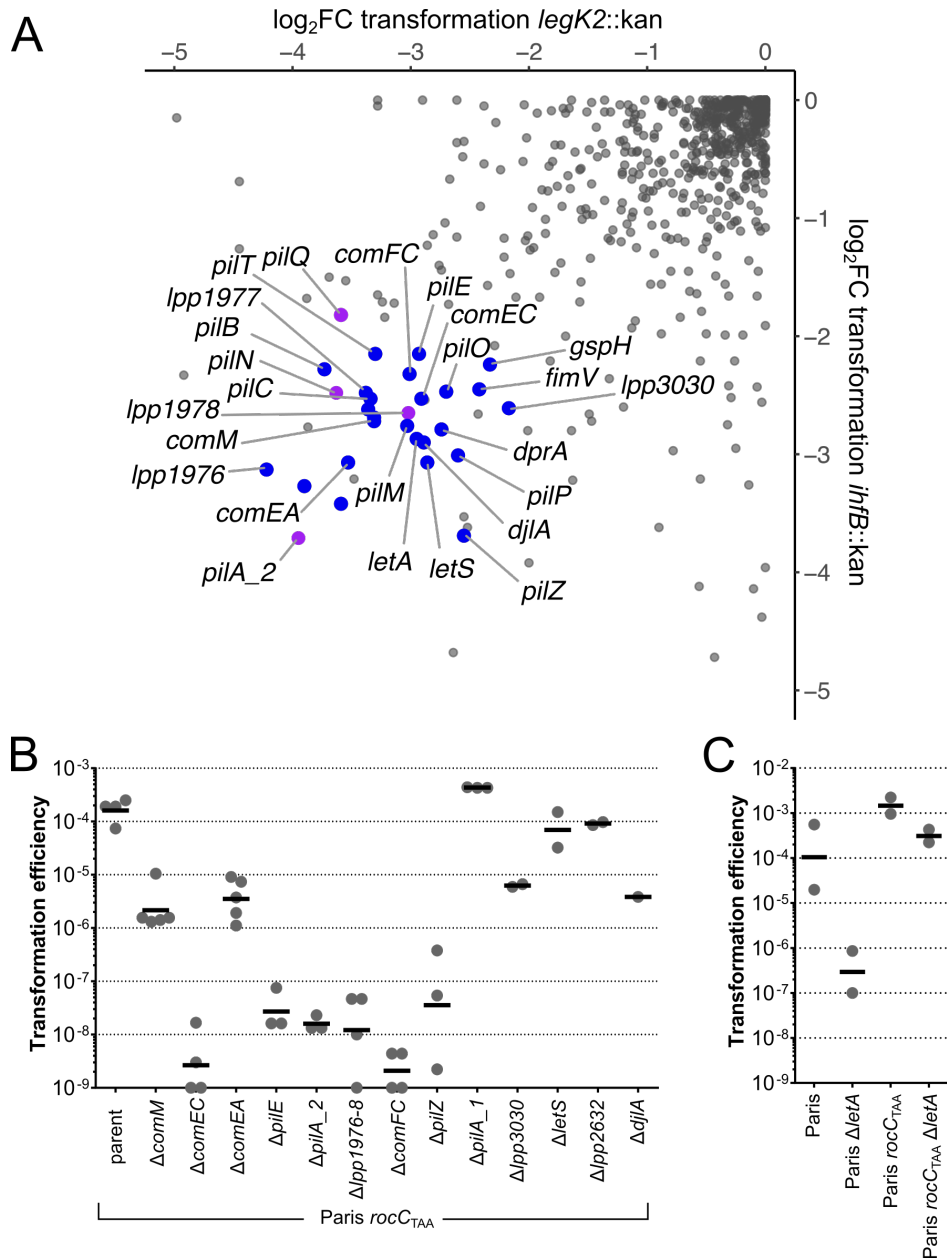

566 **Figure 2.** Identification of genes required for natural transformation by Tn-seq. A) Scatter plot of fold-change  
 567 ( $\log_2$ ) of insertions in the corresponding genes in two tested transformation conditions. HL77S was subjected  
 568 to natural transformation with a 4kb-PCR fragment of the *legK2* or *ihfB* genes interrupted by a kanamycin  
 569 resistance gene. Reads count per genes were determined and expressed as fold-change between the non-  
 570 transformed population and the *legK2::kan* or *ihfB::kan* transformed populations. Individual genes (gray dots)  
 571 were considered required for natural transformation if  $\log_2FC$  was  $>2$  or  $<-2$  and if  $P < 0.05$  in one (magenta  
 572 dots) or both conditions (blue dots). B) Natural transformation efficiency of reconstructed mutants in the Paris  
 573 *rocC*<sub>TAA</sub> strain which is constitutively competent for natural transformation. Transformation experiments were  
 574 performed at least three times independently and transformation frequencies were plotted (grey dots) along  
 575 with the geometric mean (black line). C) Natural transformation efficiency of the reconstructed mutant  $\Delta letA$   
 576 in the original Paris strain and constitutively competent Paris *rocC*<sub>TAA</sub> strain. Transformation experiments  
 577 were performed twice independently and transformation frequencies were plotted (grey dots) along with the  
 578 geometric mean (black line).

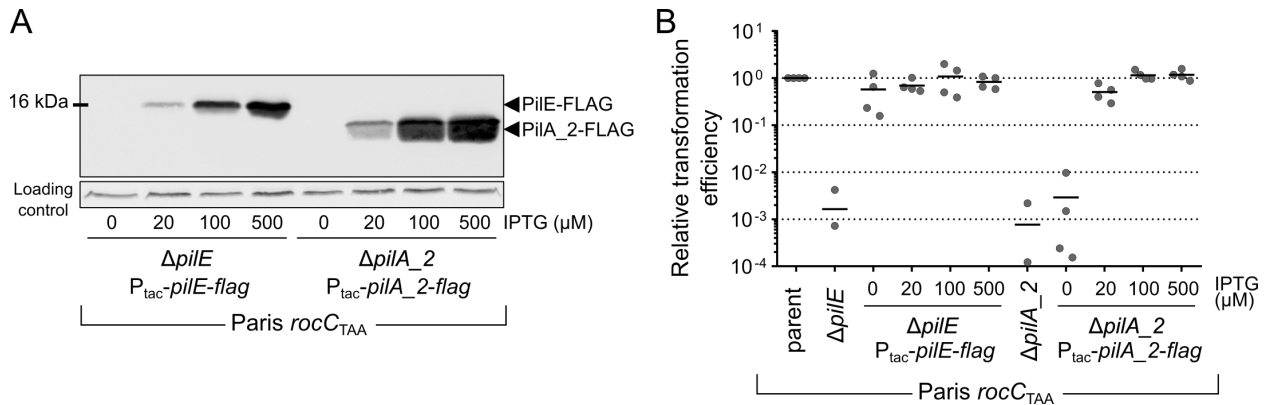

579 **Figure 3.** PilA\_2 is the major pilin of the *L. pneumophila* transformation pilus. A) Western-blot analysis of  
 580 ectopically-expressed PilA\_2-FLAG (encoded by p1890F) and PilE (encoded by p0681F) as a function of the  
 581 IPTG inducer. B) Complementation of the  $\Delta pilE$  and  $\Delta pilA_2$  mutants in the Paris  $rocC_{TAA}$  strain by the  
 582 ectopic expression of PilA\_2-FLAG (encoded by p1890F) and PilE (encoded by p0681F). Transformation  
 583 frequencies were determined four times independently as a function of the IPTG inducer, and normalized to  
 584 1 for the parental strain (Paris  $rocC_{TAA}$ ).

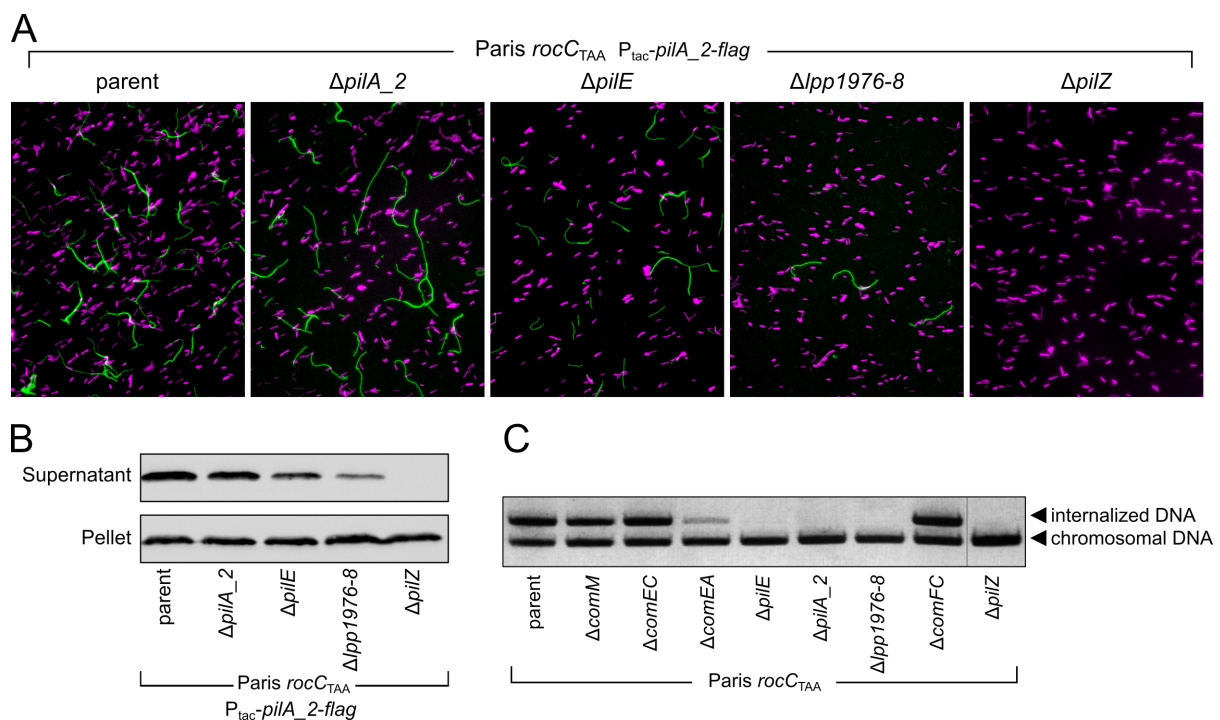

585 **Figure 4.** PilA\_2 assembly into extracellular filaments depends on *pilE*, the operon *lpp1976-8* and *pilZ*. A)  
 586 Visualization of PilA\_2-FLAG filaments (green) by immunofluorescence microscopy using fluorescein-  
 587 conjugated anti-FLAG antibody. Bacteria were visualized by labeling DNA with Hoechst 33288 (magenta). B)  
 588 Western-blot detection of extracellular PilA\_2. Bacteria were vortexed to release pili which were precipitated  
 589 from supernatants. PilA\_2-FLAG was detected in supernatant and whole cell lysates (pellet) using Anti-FLAG  
 590 antibodies. C) DNA uptake assay of the reconstructed mutants defective for natural transformation. The  
 591 ability of the transformation-deficient mutants were tested for the ability to internalize pGEM-HYG1, a non-  
 592 replicative plasmid. Following incubation with the DNA and subsequent DNase I treatment, the internalized  
 593 DNA was detected in cells by PCR for pGEM-HYG. As control, chromosomal DNA was also detected by  
 594 PCR. This multiplex PCR was analyzed by agarose gel electrophoresis and labeling of DNA with ethidium  
 595 bromide.

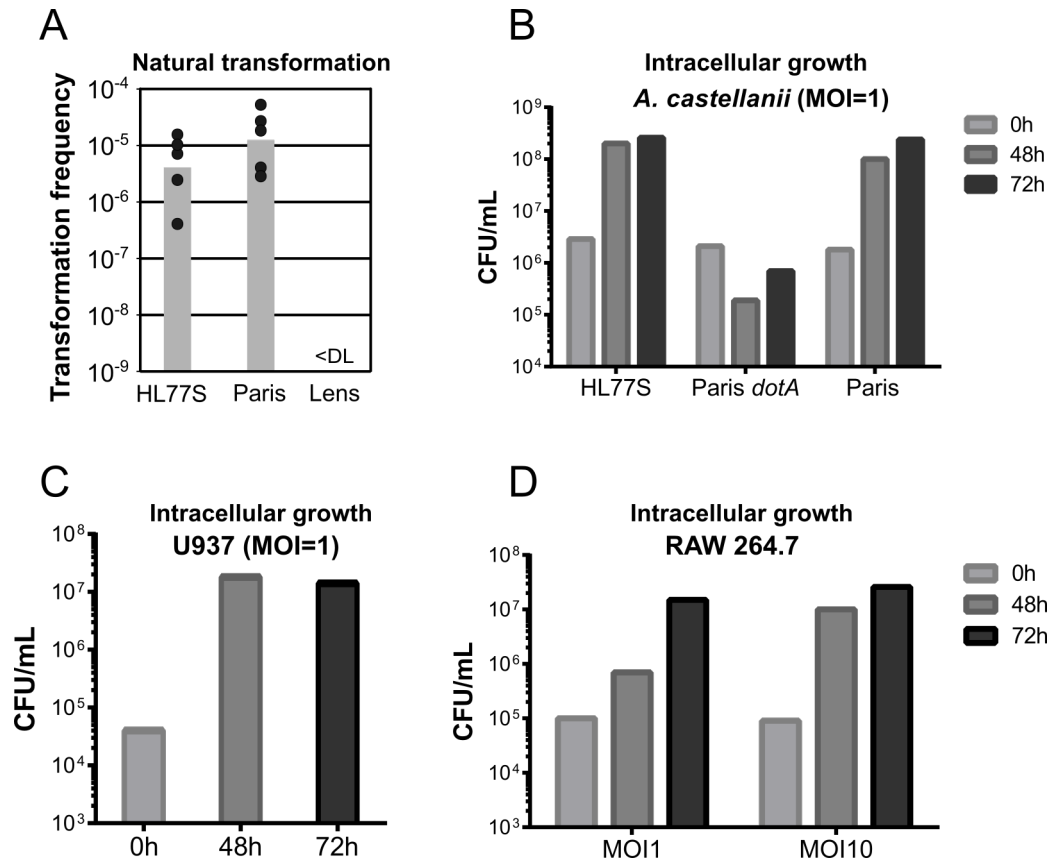

596 **Figure S1.** Phenotypic characterization of strain HL77S, a streptomycin-resistant mutant of the clinical  
597 isolate HL-0709-3014. A) Natural transformability of HL77S compared to the Paris and Lens strain.  
598 Transformation was tested by growing the strains in AYE at 30°C for 24h in the presence of 2 µg of  
599 transformation DNA consisting of a kanamycin resistance gene interrupting the *ihfB* gene. B) Intracellular  
600 replication of HL77S in the amoeba *Acanthamoeba castellanii*. Cells were infected with a suspension of  
601 HL77S at a multiplicity of infection (MOI) of 1. At the initial time point, after 48 h and 72 h of culture at 30°C,  
602 colony-forming units are determined by plating on CYE medium. C) Intracellular replication of HL77S in  
603 differentiated human monocytes of the U937 cell line. Cells were infected with a suspension of HL77S at a  
604 MOI of 1. At the initial time point, after 48 h and 72 h of culture at 30°C, colony-forming units are determined  
605 by plating on CYE. D) Intracellular replication of HL77S in the murine macrophage-like cell line RAW 264.7.  
606 Cells were infected with a suspension of HL77S at a MOI of 1 or 10. At the initial time point, after 48 h and 72  
607 h of culture at 30°C, colony-forming units are determined by plating on CYE.

608 **Table S1.** Strains, plasmids and oligonucleotides used in this study

### Strains

| Name                                                          | Genotype                                                                                                       | Source                                                                                                                                                   |
|---------------------------------------------------------------|----------------------------------------------------------------------------------------------------------------|----------------------------------------------------------------------------------------------------------------------------------------------------------|
| Paris WT                                                      | Wild-type <i>Legionella pneumophila</i>                                                                        | Paris Outbreak isolate CIP107629, CNR Lyon                                                                                                               |
| Paris_S                                                       | Spontaneous streptomycin-resistant mutant of Paris; StrepR                                                     | This study                                                                                                                                               |
| HL-0709-3014                                                  | Wild-type <i>Legionella pneumophila</i>                                                                        | Clinical isolate, CNR Lyon                                                                                                                               |
| HL77S                                                         | Spontaneous streptomycin-resistant mutant of HL-0709-3014; StrepR                                              | This study                                                                                                                                               |
| Paris <i>roc</i> <sub>TAA</sub>                               | Paris <i>roc</i> <sub>TAA</sub> (=lpp0148 <sub>TAA</sub> ); <i>rocC</i> allele with a premature stop codon TAA | Juan P-A, Attaiech L, Charpentier X. Scientific Reports 5:16033, 2015, <a href="https://doi.org/10.1038/srep16033">https://doi.org/10.1038/srep16033</a> |
| Paris <i>roc</i> <sub>TAA</sub> <i>letS::kan</i>              | Paris <i>roc</i> <sub>TAA</sub> ; lpp1887::kan; KanR                                                           | This study                                                                                                                                               |
| Paris <i>roc</i> <sub>TAA</sub> <i>letA::kan</i>              | Paris <i>roc</i> <sub>TAA</sub> ; lpp2699::kan; KanR                                                           | This study                                                                                                                                               |
| Paris <i>roc</i> <sub>TAA</sub> <i>comM::kan</i>              | Paris <i>roc</i> <sub>TAA</sub> ; lpp2632::kan; KanR                                                           | This study                                                                                                                                               |
| Paris <i>roc</i> <sub>TAA</sub> <i>comEC::kan</i>             | Paris <i>roc</i> <sub>TAA</sub> ; lpp0680::kan; KanR                                                           | This study                                                                                                                                               |
| Paris <i>roc</i> <sub>TAA</sub> <i>pilE::kan</i>              | Paris <i>roc</i> <sub>TAA</sub> ; lpp0681::kan; KanR                                                           | This study                                                                                                                                               |
| Paris <i>roc</i> <sub>TAA</sub> <i>comEA::kan</i>             | Paris <i>roc</i> <sub>TAA</sub> ; lpp0872::kan; KanR                                                           | This study                                                                                                                                               |
| Paris <i>roc</i> <sub>TAA</sub> <i>pilA_1::kan</i>            | Paris <i>roc</i> <sub>TAA</sub> ; lpp1890::kan; KanR                                                           | This study                                                                                                                                               |
| Paris <i>roc</i> <sub>TAA</sub> <i>lpp1976-1977-1978::kan</i> | Paris <i>roc</i> <sub>TAA</sub> ; lpp1976-1977-1978::kan; KanR                                                 | This study                                                                                                                                               |
| Paris <i>roc</i> <sub>TAA</sub> <i>comF::kan</i>              | Paris <i>roc</i> <sub>TAA</sub> ; lpp2280::kan; KanR                                                           | This study                                                                                                                                               |
| Paris <i>roc</i> <sub>TAA</sub> <i>pilA_2::kan</i>            | Paris <i>roc</i> <sub>TAA</sub> ; lpp1889::kan; KanR                                                           | This study                                                                                                                                               |
| Paris <i>roc</i> <sub>TAA</sub> <i>pilZ::kan</i>              | Paris <i>roc</i> <sub>TAA</sub> ; lpp1356::kan; KanR                                                           | This study                                                                                                                                               |
| Paris <i>roc</i> <sub>TAA</sub> <i>lpp3030::kan</i>           | Paris <i>roc</i> <sub>TAA</sub> ; lpp3030::kan; KanR                                                           | This study                                                                                                                                               |
| Paris <i>roc</i> <sub>TAA</sub> <i>djlA::kan</i>              | Paris <i>roc</i> <sub>TAA</sub> ; lpp2289::kan; KanR                                                           | This study                                                                                                                                               |
| Paris <i>roc</i> <sub>TAA</sub> <i>lpp2632::kan</i>           | Paris <i>roc</i> <sub>TAA</sub> ; lpp2632::kan; KanR                                                           | This study                                                                                                                                               |
| Paris <i>letA::kan</i>                                        | Paris lpp2699::kan; KanR                                                                                       | This study                                                                                                                                               |
| Paris <i>dotA::kan</i>                                        | Paris dotA::kan; KanR                                                                                          | This study                                                                                                                                               |
| MFDpir                                                        | <i>Escherichia coli</i> ; MG1655 RP4-2-Tc::[ΔMu1::aac(3)IV-ΔaphA-Δnic35-ΔMu2::zeo] ΔdapA::(erm-pir) ΔrecA      | Ferrières L et al., J Bacteriol 192:6418–6427, 2010, <a href="https://doi.org/10.1128/jb.00621-10">https://doi.org/10.1128/jb.00621-10</a>               |

### Plasmids

| Name           | Genotype                             | Description                                                                                                     | source                                                                                                                                                         |
|----------------|--------------------------------------|-----------------------------------------------------------------------------------------------------------------|----------------------------------------------------------------------------------------------------------------------------------------------------------------|
| pGEM-ihfB::kan | pGEM-T Easy::ihfB::nptII; AmpR, KanR | plasmid bearing the <i>ihfB</i> gene of <i>L. pneumophila</i> Paris interrupted by a kanamycin cassette ; Kan R | Juan P-A, Attaiech L, Charpentier X. 2015. Scientific Reports 5:16033, 2015, <a href="https://doi.org/10.1038/srep16033">https://doi.org/10.1038/srep16033</a> |
| pGEM-HYG1      | pGEM-T Easy::hygR                    | plasmid bearing an hygromycine cassette ; HygR                                                                  | This study                                                                                                                                                     |



|                        |                                                              |                                                                                                                                   |                                                                                                                                                                                           |
|------------------------|--------------------------------------------------------------|-----------------------------------------------------------------------------------------------------------------------------------|-------------------------------------------------------------------------------------------------------------------------------------------------------------------------------------------|
| pJET1.2-<br>legk2::kan | pJET1.2 ;<br><i>legk2</i> ::kan from<br>HL77 ; AmpR,<br>KanR | plasmid bearing the <i>legK2</i> gene of <i>L. pneumophila</i> HL77 interrupted by a kanamycin cassette ; Kan R                   | This study                                                                                                                                                                                |
| pBT20                  | Gmr; Himar1C9<br>transposon                                  | Pir-dependent, mobilizable plasmid carrying the Mariner Himar1 transposon with gentamycin resistant gene                          | Kulasekara HD et al.,<br>Molecular Microbiol 55:368–<br>380, 2005,<br><a href="https://doi.org/10.1111/j.1365-2958.2004.04402.x">https://doi.org/10.1111/j.1365-2958.2004.04402.x</a>     |
| pMMB207C               | RSF1010:: <i>lacI<sup>l</sup>-<br/>tacp mobA</i>             | cloning vector for expression genes under the P <sub>tac</sub> promoter, derived from RSF1010 ; CmR                               | Segal, G. & Shuman, H. A.<br>Molecular Microbiology 30,<br>197–208, 1998, <a href="https://doi.org/10.1046/j.1365-2958.1998.01054.x">https://doi.org/10.1046/j.1365-2958.1998.01054.x</a> |
| p0681F                 | pMMB207C ;<br>lpp0681::FLAG                                  | complementation plasmid for the lpp0681::kan mutant, expressing the lpp0681-FLAG (P <sub>lppE</sub> -FLAG) fusion protein ; CmR   | This study                                                                                                                                                                                |
| p1890F                 | pMMB207C ;<br>lpp1890::FLAG                                  | complementation plasmid for the lpp1890::kan mutant, expressing the lpp1890-FLAG (P <sub>lppA_2</sub> -FLAG) fusion protein ; CmR | This study                                                                                                                                                                                |

## Oligonucleotides

| Name                      | sequence                                                         | use                                                            |
|---------------------------|------------------------------------------------------------------|----------------------------------------------------------------|
| LH1_lpp3030_P1            | ctgcatgggatattggtatcactgc                                        | Forward primer to amplify a 2kB fragment upstream of lpp3030   |
| LH2_lpp3030_P2-tail-pKD4  | GGAACTTCGAAGCAGCTCCAGCCTAC<br>ACAATCtgccgatgataaacaagcgagagcc    | Reverse primer to amplify a 2kB fragment upstream of lpp3030   |
| LH3_lpp3030_P3-tail-pKD4  | GAACTAAGGAGGATATTCATATGGACC<br>ATGGCgaaaatctgccgatactgtttctgc    | Forward primer to amplify a 2kB fragment downstream of lpp3030 |
| LH4_lpp3030_P4            | ggtcccatctcattctccttaatcc                                        | Reverse primer to amplify a 2kB fragment downstream of lpp3030 |
| LH5_lpp1887_P1            | gggtaatttcctgagacagtggagg                                        | Forward primer to amplify a 2kB fragment upstream of letS      |
| LH6_lpp1887_P2-tail-pKD4  | GGAACTTCGAAGCAGCTCCAGCCTAC<br>ACAATCggcaggaataagagtagtgattcttagc | Reverse primer to amplify a 2kB fragment upstream of letS      |
| LH7_lpp1887_P3-tail-pKD4  | GAACTAAGGAGGATATTCATATGGACC<br>ATGGCctaagtctgataatttaaccggagcc   | Forward primer to amplify a 2kB fragment downstream of letS    |
| LH8_lpp1887_P4            | ggtggaggtaccatagttatgaccc                                        | Reverse primer to amplify a 2kB fragment downstream of letS    |
| LH9_lpp2699_P1            | ggtatcctgtctgacagtctaaacc                                        | Forward primer to amplify a 2kB fragment upstream of letA      |
| LH10_lpp2699_P2-tail-pKD4 | GGAACTTCGAAGCAGCTCCAGCCTAC<br>ACAATCtcccattctaaccaatgcatggtc     | Reverse primer to amplify a 2kB fragment upstream of letA      |
| LH11_lpp2699_P3-tail-pKD4 | GAACTAAGGAGGATATTCATATGGACC<br>ATGGCcgattattgaacaccccaatg        | Forward primer to amplify a 2kB fragment downstream of letA    |
| LH12_lpp2699_P4           | caggggaaatcaaagacattgcc                                          | Reverse primer to amplify a 2kB fragment downstream of letA    |
| LH21_lpp2632_P1           | cggtcttgatattattcgagac                                           | Forward primer to amplify a 2kB fragment upstream of lpp2632   |
| LH22_lpp2632_P2-tail-pKD4 | GGAACTTCGAAGCAGCTCCAGCCTAC<br>ACAATCcgagacacactatctcgtatcatgc    | Reverse primer to amplify a 2kB fragment upstream of lpp2632   |
| LH23_lpp2632_P3-tail-pKD4 | GAACTAAGGAGGATATTCATATGGACC<br>ATGGCgtgcatactttgtcttgggaagac     | Forward primer to amplify a 2kB fragment downstream of lpp2632 |
| LH24_lpp2632_P4           | gatggagaaattttccgctcatcc                                         | Reverse primer to amplify a 2kB fragment downstream of lpp2632 |
| LH29_lpp2289_P1           | caggaatgtcacactgaattttcc                                         | Forward primer to amplify a 2kB fragment upstream of djlA      |
| LH30_lpp2289_P2-tail-pKD4 | GGAACTTCGAAGCAGCTCCAGCCTAC<br>ACAATCccccaccaggtgtttatacaag       | Reverse primer to amplify a 2kB fragment upstream of djlA      |

|                           |                                                                     |                                                                                             |
|---------------------------|---------------------------------------------------------------------|---------------------------------------------------------------------------------------------|
| LH31_lpp2289_P3-tail-pKD4 | GAACTAAGGAGGATATTCATATGGACC<br>ATGGCgctcaaggttaccgaagaaatg          | Forward primer to amplify a 2kB<br>fragment downstream of djIA                              |
| LH32_lpp2289_P4           | cgagtcagggaagtgttacagg                                              | Reverse primer to amplify a 2kB<br>fragment downstream of djIA                              |
| rpsL_Fw                   | GCAGCTCCAGATGGCTCAATC                                               | Forward primer to amplify a 2kB<br>fragment downstream of rpsL                              |
| rpsL_Rv                   | CAACCATAACATGTCCATATTGACCAC                                         | Reverse primer to amplify a 2kB<br>fragment upstream of rpsL                                |
| lpp0640_P1                | TCATCCAACCTCATCTCGCAATCG                                            | Forward primer to amplify a 2kB<br>fragment upstream of comM                                |
| lpp0640_P2-tail-pKD4      | GGAACTTCGAAGCAGCTCCAGCCTAC<br>ACAATCACTGCTGTTTCAGCAAGTCCT<br>ACC    | Reverse primer to amplify a 2kB<br>fragment upstream of comM                                |
| lpp0640_P3-tail-pKD4      | GAACTAAGGAGGATATTCATATGGACC<br>ATGGCGTCTGCTCGTGGCTACCATCGC          | Forward primer to amplify a 2kB<br>fragment downstream of comM                              |
| lpp0640_P4                | GCTGTAGGACAGCGGCTAACTTG                                             | Reverse primer to amplify a 2kB<br>fragment downstream of comM                              |
| lpp0681_P1                | ATGGGAGCTGGCGTAGATCCTG                                              | Reverse primer to amplify a 2kB<br>fragment downstream of pilE                              |
| lpp0681_P2-tail-pKD4      | GGAACTTCGAAGCAGCTCCAGCCTAC<br>ACAATCGGCAATTGAAACCAGAATGC<br>CC      | Reverse primer to amplify a 2kB<br>fragment downstream of pilE                              |
| lpp0681_P3-tail-pKD4      | GAACTAAGGAGGATATTCATATGGACC<br>ATGGCAAACAACGCCGAACGGGTAC            | Reverse primer to amplify a 2kB<br>fragment downstream of pilE                              |
| lpp0681_P4                | CATTGCCATTGCGGGTATGAATG                                             | Reverse primer to amplify a 2kB<br>fragment downstream of pilE                              |
| lpp1889_P1                | GTGAACTGCAGCAAGCTCCATCC                                             | Reverse primer to amplify a 2kB<br>fragment downstream of pilA_1                            |
| lpp1889_P2-tail-pKD4      | GGAACTTCGAAGCAGCTCCAGCCTAC<br>ACAATCGATGGCAACCAGAATCCCAA<br>G       | Reverse primer to amplify a 2kB<br>fragment downstream of pilA_1                            |
| lpp1889_P3-tail-pKD4      | GAACTAAGGAGGATATTCATATGGACC<br>ATGGCTGCAAACGCAGGTAATGGCAC           | Reverse primer to amplify a 2kB<br>fragment downstream of pilA_1                            |
| lpp1889_P4                | GCGAAATGGCCGTTACTGCTTG                                              | Reverse primer to amplify a 2kB<br>fragment downstream of pilA_1                            |
| lpp1890_P1                | GTCAGGTAATAACCGGGTTTGCC                                             | Reverse primer to amplify a 2kB<br>fragment downstream of pilA_2                            |
| lpp1890_P2-tail-pKD4      | GGAACTTCGAAGCAGCTCCAGCCTAC<br>ACAATCGCGATTGCTGCCAAAATACCG           | Reverse primer to amplify a 2kB<br>fragment downstream of pilA_2                            |
| lpp1890_P3-tail-pKD4      | GAACTAAGGAGGATATTCATATGGACC<br>ATGGCAATTGCTATTGGTGCGAACGG           | Reverse primer to amplify a 2kB<br>fragment downstream of pilA_2                            |
| lpp1890_P4                | CAGTCTGGTGGTGTGACCGCTG                                              | Reverse primer to amplify a 2kB<br>fragment downstream of pilA_2                            |
| lpp2280_P1                | CCGGCAACTGGAAAAGGGAG                                                | Reverse primer to amplify a 2kB<br>fragment downstream of comF                              |
| lpp2280_P2-tail-pKD4      | GGAACTTCGAAGCAGCTCCAGCCTAC<br>ACAATCTCCATGCAATTAGAGCAAAC<br>TGC     | Reverse primer to amplify a 2kB<br>fragment downstream of comF                              |
| lpp2280_P3-tail-pKD4      | GAACTAAGGAGGATATTCATATGGACC<br>ATGGCAAGCCAACCTTGATGGAGAGC           | Reverse primer to amplify a 2kB<br>fragment downstream of comF                              |
| lpp2280_P4                | GCCCCAAGCTACAAATACCATAG                                             | Reverse primer to amplify a 2kB<br>fragment downstream of comF                              |
| lpp1976-1978_P1           | CAATCAATCAAACCTCTCTCAAGAACG                                         | Reverse primer to amplify a 2kB<br>fragment downstream of the operon of<br>unknown function |
| lpp1976-1978_P2-tail-pKD4 | GGAACTTCGAAGCAGCTCCAGCCTAC<br>ACAATCGCCAGATAAGATGATTGATTA<br>GATCTC | Reverse primer to amplify a 2kB<br>fragment downstream of the operon of<br>unknown function |
| lpp1976-1978_P3-tail-pKD4 | GAACTAAGGAGGATATTCATATGGACC<br>ATGGCGGTGAAGGAAGGGGTAAGCA<br>GC      | Reverse primer to amplify a 2kB<br>fragment downstream of the operon of<br>unknown function |
| lpp1976-1978_P4           | GAAAATGAATGGGAGCTTCTGG                                              | Reverse primer to amplify a 2kB<br>fragment downstream of the operon of                     |

|                      |                                                                              |                                                                                                           |
|----------------------|------------------------------------------------------------------------------|-----------------------------------------------------------------------------------------------------------|
| lpp0872_P1           | GTAGTGGGAGGAAGCTTAGG                                                         | unknown function<br>Reverse primer to amplify a 2kB fragment downstream of comEA                          |
| lpp0872_P2-tail-pKD4 | GGAACTTCGAAGCAGCTCCAGCCTAC<br>ACAATCGAGGCTCGTTCTCAGCTTGA<br>GAAGAG           | Reverse primer to amplify a 2kB fragment downstream of comEA                                              |
| lpp0872_P3-tail-pKD4 | GAACTAAGGAGGATATTCATATGGACC<br>ATGGCGCGGAAGTCAAGGGTATAGG                     | Reverse primer to amplify a 2kB fragment downstream of comEA                                              |
| lpp0872_P4           | GCGACAGGGCTAACTGTAAC                                                         | Reverse primer to amplify a 2kB fragment downstream of comEA                                              |
| olj376               | GTGACTGGAGTTCAGACGTGTGCTCT<br>TCCGATCTGGGGGGGGGGGGGGGGGG                     | Primer for Tn-seq to amplify transposon junction and add polyC-tail during PCR1                           |
| pBT20-PCR1           | Biotin-<br>TCGTATAATGTGTGGAATTGTGAGCGG                                       | Biotinylated primer for Tn-seq to amplify transposon junction during PCR1                                 |
| pBT20-PCR2           | AATGATACGGCGACCACCGAGATCTAC<br>ACTCTTTGGACTCTAGAGGATCACCCA<br>GCTTTCTTG      | Primer for Tn-seq to amplify transposon junction during PCR2                                              |
| TdT_Index_X          | CAAGCAGAAGACGGCATAACGAGATXX<br>XXXXGTGACTGGAGTTCAGACGTGTG<br>CTCTTCCGATCT    | HPLC-purified primer for Tn-seq to amplify transposon junction and add index for multiplexing during PCR2 |
| Read1TnLp            | CTAGAGACCGGGACTTATCAGCCAA<br>CCTGTTA                                         | HPLC-purified custom sequencing primer for Tn-seq library sequencing                                      |
| lpp0681-F            | CCGGGGATCCGCAAATTCAATAGAGG<br>ATACCCAAATG                                    | cloning of lpp0681 in pMM207C                                                                             |
| lpp0681F-R           | AGCCAAGCTTTTACTTGTTCATCGTCGT<br>CCTTGTAATCAGCGCTACCGGGATTCC<br>AGCATTCTGGTTG | cloning of lpp0681 in pMM207C                                                                             |
| lpp1890-F            | CCGGGGATCCGTTAACTATGGAGATGG<br>TCATGAGAC                                     | cloning of lpp1890 in pMM207C                                                                             |
| lpp1890F-R           | AGCCAAGCTTTTACTTGTTCATCGTCGT<br>CCTTGTAATCAGCGCTTGGTCTGCAGC<br>TGGCAGGTCG    | cloning of lpp1890 in pMM207C                                                                             |
| mreBseqF             | TCCGGTAAAAGCAGTTGTCTGG                                                       | Forward primer to amplify <i>mreB</i> , chromosomal control for uptake test                               |
| mreBseqR             | CCCAGAGAACTGTGTCCGCCC                                                        | Reverse primer to amplify <i>mreB</i> , chromosomal control for uptake test                               |
| M13F(-47)            | CGCCAGGGTTTTCCAGTCACGAC                                                      | Forward primer to amplify a 1657 pb fragment of the pGEM-HYG1                                             |
| M13R(-48)            | AGCGGATAACAATTTACACAGGA                                                      | Reverse primer to amplify a 1657 pb fragment of the pGEM-HYG1                                             |
